# Supplementary material for: On the reaction of GeCl2·dioxane with KFeCp(CO)2: isolation and characterization of novel bimetallic clusters
Source: Royal Society of Chemistry journal article supplement (doi:10.1039/c9dt00097f), 2019-01-01
Supplement: c9dt00097f1.pdf [file c9dt00097f1.pdf]

- Supporting Information -

**On the reaction of  $\text{GeCl}_2$ ·Dioxane with  $\text{KFeCp}(\text{CO})_2$ : Isolation and characterization of novel bimetallic clusters**

Lars Preißing, Claudio Schrenk and Andreas Schnepf\*

[\*] Prof. Dr. A. Schnepf, Tel.: Int. Code +49 (7071) 29 – 76635; Fax: Int. Code +49 (7071) 28

– 2436; Email: [andreas.schnepf@uni-tuebingen.de](mailto:andreas.schnepf@uni-tuebingen.de)

Institut für Anorganische Chemie, Universität Tübingen, Auf der Morgenstelle 18, D-72076  
Tübingen, Germany.

**Content:**

1. Experimental section
2. Crystallographic details
3. Spectroscopical investigation
4. Quantum chemical calculation

## 1. Experimental section

### General Considerations

All manipulations were carried out under nitrogen or in vacuo in Schlenk-type glassware on a Schlenk line. Solvents were pre-dried over sodium benzophenone (thf, toluene) or calcium hydride (pentane) and distilled.  $\text{GeCl}_2 \cdot \text{Dioxane}$  was prepared according to Thorne et al.<sup>[1]</sup>  $\text{KFeCp(CO)}_2$  was prepared by reductive cleavage of  $[\text{FeCp(CO)}_2]_2$  with potassium.  $^1\text{H}$ - and  $^{13}\text{C}$ - NMR measurements were done at a Bruker DRX250 and Bruker Avance II+ 400 spectrometer. All values are given in ppm against the external standard  $\text{SiMe}_4$ . IR spectra were recorded at 298 K on a Bruker Vertex 70 spectrometer. All compounds were measured in a KBr-pellet under nitrogen atmosphere. The pellets were prepared under argon atmosphere. UV-Vis spectra were recorded in thf solutions at a PG Instruments T60 UV/VIS Spectrophotometer in quartz cuvettes with thf as a blank sample (light source of the spectrometer changes at 360 nm causing absorption jumps in the recorded spectra).

### Preparation

**$\text{Ge}_6[\text{FeCp(CO)}_2]_6$ .** To a solution of  $\text{GeCl}_2 \cdot \text{Dioxane}$  (2 mmol, 463 mg, 1 eq) in thf (25 mL) cooled to  $-78^\circ\text{C}$  a solution of  $\text{KFeCp(CO)}_2$  (4 mmol, 864 mg, 2eq) in thf (25 mL) was added. The resulting reaction mixture was slowly warmed to room temperature under stirring over night. The black solution was then stirred at room temperature for 2 days. Removal of the solvent under vacuum yielded a dark red residue. Washing with pentane and extraction with toluene gave a black toluene solution. Concentration of the extract under vacuum and storage at  $-28^\circ\text{C}$  gave dark red crystals of **1** (60 mg, 10 %).

$^1\text{H}$  NMR (250 MHz, thf-d8):  $\delta$  in ppm 4.94 (s, 30H).

$^{13}\text{C}$  NMR (62.9 MHz, thf-d8):  $\delta$  in ppm 85.4 (s), 216.0 (s).

IR (KBr):  $\nu = 1971.24(\text{s, br.}), 1917.30(\text{s, br.}), 1059.10(\text{w}), 1003.97(\text{w, br.}), 824.88(\text{m, sh.}), 636.10(\text{m, sh.}), 572.83(\text{s, sh.}), 514.55(\text{m, sh.}) \text{ cm}^{-1}$ .

**[(CO)<sub>3</sub>Cp<sub>2</sub>Fe<sub>2</sub>]-μ-GeCl[FeCp(CO)<sub>2</sub>].** To a solution of GeCl<sub>2</sub>·Dioxane (2 mmol, 463 mg, 1 eq) in thf (25 mL) cooled to -78°C a solution of KFeCp(CO)<sub>2</sub> (4 mmol, 864 mg, 2eq) in thf (25 mL) was added. The resulting reaction mixture was slowly warmed to room temperature under stirring over night leading to a black reaction solution. Removal of the solvent in vacuum yielded a dark red residue. Washing with pentane and extraction with toluene gave a black toluene solution. The solvent was then removed in vacuum again and the residue was solved in thf. Precipitation with pentane gave a black solid. The protruding solution was filtrated and stored at room temperature forming a black precipitate. Recrystallisation of this precipitate from thf-pentane (3:2) at room temperature gave dark red crystals of **2** (70 mg, 6%).

<sup>1</sup>H NMR (250 MHz, thf-d<sub>8</sub>): δ in ppm 4.83 (s, 10H, [(CO)<sub>3</sub>Cp<sub>2</sub>Fe<sub>2</sub>]), 5.18 (s, 5H).

<sup>13</sup>C NMR (62.9 MHz, thf-d<sub>8</sub>): δ in ppm 86.5 (s), 87.1 (s), 212.5 (s), 213.8 (s).

IR (KBr): ν = 2008.52(s, sh.), 1958.12(s, sh.), 1937.69(s), 1757.43(s, sh.), 830.71(w), 634.24(w, sh.), 608.54(m, sh.), 583.26(m, sh.), 566.64 (m, sh.), 547.35 (m, sh.), 492.83 (m, sh.) cm<sup>-1</sup>.

**Ge<sub>6</sub>[FeCp(CO)<sub>2</sub>]<sub>6</sub>Cl<sub>2</sub>.** To a solution of GeCl<sub>2</sub>·Dioxane (2 mmol, 463 mg, 1 eq) in thf (25 mL) cooled to -78°C a solution of KFeCp(CO)<sub>2</sub> (4 mmol, 864 mg, 2eq) in thf (25 mL) was added. The resulting reaction mixture was slowly warmed to room temperature under stirring over night. The black solution was then stirred at room temperature for 2 days. Removal of the solvent under vacuum yielded a dark red residue. Washing with pentane and extraction with toluene gave a black toluene solution. The extract was overlaid with pentane what yielded a black precipitate. After filtration and removal of the solvent in vacuo, the resulting dark red residue was solved in a mixture of pentane-thf (2:1). After storage at +6°C, the resulting dark red solution gave black hexagonal crystals of **3** (65 mg, 12%).

<sup>1</sup>H NMR (400 MHz, thf-d<sub>8</sub>): δ in ppm 5.09 (t, J= 0.56 Hz, 20H), 4.92 (d, J= 0.56 Hz, 10H).

<sup>13</sup>C NMR (100.6 MHz, thf-d<sub>8</sub>): δ in ppm 85.4 (s), 85.5 (s), 85.7 (s).

IR (KBr):  $\nu = 1987.06(\text{s, br.}), 1961.54(\text{s, sh.}), 1059.09(\text{w}), 831.72(\text{m}), 632.16(\text{m, sh.}), 572.88(\text{s, sh.}), 506.63(\text{m}) \text{ cm}^{-1}$ .

**Ge<sub>6</sub>[FeCp(CO<sub>2</sub>)]<sub>4</sub>[Fe<sub>2</sub>Cp<sub>2</sub>(CO)<sub>3</sub>]<sub>2</sub>.** To a solution of GeCl<sub>2</sub>·Dioxane (0.5 mmol, 116 mg, 1 eq) in thf (15 mL) cooled to -78°C a solution of KFeCp(CO)<sub>2</sub> (1 mmol, 216 mg, 2eq) in thf (15 mL) was added. The resulting reaction mixture was slowly warmed to room temperature under stirring overnight. The black solution was then stirred at room temperature for 2 days. The reaction mixture was cooled to -78°C again and a solution of K-benzophenone (1M, 0.33 ml, 0.66 eq) in thf was added. The resulting mixture was warmed to room temperature and then stirred overnight. Removal of the solvent in vacuum yielded a dark red residue. Washing with pentane and extraction with toluene gave a black toluene solution. Concentration of the extract under vacuum and storage at -28 °C gave dark red crystals of **5**.

<sup>1</sup>H NMR (400 MHz, thf-d<sub>8</sub>):  $\delta$  in ppm 4.85 (s, 20H, [Fe<sub>2</sub>Cp<sub>2</sub>(CO)<sub>3</sub>]), 5.13 (s, 20H).

<sup>13</sup>C NMR and IR spectra could not be measured because there were only a few crystals formed of **5** which could not be completely separated from side products (see figure S9).

## 2. Crystallographic details

Crystals were mounted on the diffractometer at 150 K. The data were collected on a Bruker APEX II DUO diffractometer equipped with an I $\mu$ S microfocus sealed tube and QUAZAR optics for monochromated MoK $\alpha$  radiation ( $\lambda = 0.71073 \text{ \AA}$ ) and equipped with an Oxford Cryosystems cryostat. A semiempirical absorption correction was applied using the program SADABS. The structure was solved by direct methods and refined against  $F^2$  for all observed reflections. Programs used: SHELXS and SHELXL<sup>[2]</sup> within the Olex2 program package.<sup>[3]</sup> The prismane **2** contains only half of the molecule in the asymmetrical unit, all Cp rings have to be refined with a disorder model. Compound **3** is refined as inversion twin due to an ambiguous flack parameter in the non-centrosymmetric space group *Cc*. A refinement in the centrosymmetric space group *C2/c* with half a molecule in the asymmetrical unit leads to a complicated situation at the atom Ge1, where a Cl and a FeCp(CO)<sub>2</sub> group is bound. Due to the torsion angle of the two Cl atoms in **3** (92°), both Cl atoms cannot be symmetrical equivalent. Therefore, a disorder model would be needed, which will not give more information than the refinement in the lower symmetric space group *Cc*. The H atom positions in all compounds were refined using a riding model. The supplementary crystallographic data (for CCDC numbers, see Table S1) can be obtained online free of charge at [www.ccdc.cam.ac.uk/conts/retrieving.html](http://www.ccdc.cam.ac.uk/conts/retrieving.html) or from Cambridge Crystallographic Data Centre, 12 Union Road, Cambridge CB21EZ; Fax: (+44)1223-336-033; or [deposit@ccdc.cam.ac.uk](mailto:deposit@ccdc.cam.ac.uk).

Table S1: Crystallographic details of the presented structures

|                                             | Ge <sub>6</sub> [FeCp(CO) <sub>2</sub> ] <sub>6</sub> <b>1</b><br>• 3 toluene   | [(CO) <sub>3</sub> Cp <sub>2</sub> Fe <sub>2</sub> ]-μ-<br>GeCl[FeCp(CO) <sub>2</sub> ] <sub>2</sub> <b>2</b> | Ge <sub>6</sub> [FeCp(CO) <sub>2</sub> ] <sub>6</sub> Cl <sub>2</sub> <b>3</b><br>• 2 THF       | Ge <sub>6</sub> [FeCp(CO) <sub>2</sub> ] <sub>4</sub> [μ-<br>Fe <sub>2</sub> Cp <sub>2</sub> (CO) <sub>3</sub> ] <sub>2</sub> <b>5</b> • 4<br>toluene |
|---------------------------------------------|---------------------------------------------------------------------------------|---------------------------------------------------------------------------------------------------------------|-------------------------------------------------------------------------------------------------|-------------------------------------------------------------------------------------------------------------------------------------------------------|
| Empirical formula                           | C <sub>63</sub> H <sub>54</sub> Fe <sub>6</sub> Ge <sub>6</sub> O <sub>12</sub> | C <sub>20</sub> H <sub>15</sub> ClFe <sub>3</sub> GeO <sub>5</sub>                                            | C <sub>50</sub> H <sub>46</sub> Cl <sub>2</sub> Fe <sub>6</sub> Ge <sub>6</sub> O <sub>14</sub> | C <sub>82</sub> H <sub>72</sub> Fe <sub>8</sub> Ge <sub>6</sub> O <sub>14</sub>                                                                       |
| Formula weight                              | 1773.70                                                                         | 610.91                                                                                                        | 1712.41                                                                                         | 2163.73                                                                                                                                               |
| Temperature/K                               | 150.1                                                                           | 150.0                                                                                                         | 150.01                                                                                          | 150.0                                                                                                                                                 |
| Crystal system                              | monoclinic                                                                      | monoclinic                                                                                                    | monoclinic                                                                                      | tetragonal                                                                                                                                            |
| Space group                                 | <i>C2/c</i>                                                                     | <i>P2<sub>1</sub>/c</i>                                                                                       | <i>Cc</i>                                                                                       | <i>I4<sub>1</sub>/a</i>                                                                                                                               |
| a/Å                                         | 31.133(2)                                                                       | 13.6340(12)                                                                                                   | 11.6575(9)                                                                                      | 20.9394(10)                                                                                                                                           |
| b/Å                                         | 11.6457(8)                                                                      | 9.1694(8)                                                                                                     | 21.880(2)                                                                                       | 20.9394(10)                                                                                                                                           |
| c/Å                                         | 19.5361(15)                                                                     | 17.4443(15)                                                                                                   | 22.8176(18)                                                                                     | 17.7553(19)                                                                                                                                           |
| α/°                                         | 90                                                                              | 90                                                                                                            | 90                                                                                              | 90                                                                                                                                                    |
| β/°                                         | 111.2250(10)                                                                    | 111.6570(10)                                                                                                  | 95.141(2)                                                                                       | 90                                                                                                                                                    |
| γ/°                                         | 90                                                                              | 90                                                                                                            | 90                                                                                              | 90                                                                                                                                                    |
| Volume/Å <sup>3</sup>                       | 6602.7(8)                                                                       | 2026.9(3)                                                                                                     | 5796.6(9)                                                                                       | 7785.0(11)                                                                                                                                            |
| Z                                           | 4                                                                               | 4                                                                                                             | 4                                                                                               | 4                                                                                                                                                     |
| ρ <sub>calc</sub> /g/cm <sup>3</sup>        | 1.784                                                                           | 2.002                                                                                                         | 1.962                                                                                           | 1.846                                                                                                                                                 |
| μ/mm <sup>-1</sup>                          | 4.021                                                                           | 3.736                                                                                                         | 4.667                                                                                           | 3.784                                                                                                                                                 |
| F(000)                                      | 3504.0                                                                          | 1208.0                                                                                                        | 3360.0                                                                                          | 4304.0                                                                                                                                                |
| Crystal size/mm <sup>3</sup>                | 0.39 × 0.151 × 0.148                                                            | 0.296 × 0.24 × 0.239                                                                                          | 0.365 × 0.239 × 0.056                                                                           | 0.226 × 0.21 × 0.117                                                                                                                                  |
| Radiation                                   | MoKα (λ = 0.71073)                                                              | MoKα (λ = 0.71073)                                                                                            | MoKα (λ = 0.71073)                                                                              | MoKα (λ = 0.71073)                                                                                                                                    |
| 2θ range for data collection/°              | 3.768 to 61.034                                                                 | 4.864 to 61.154                                                                                               | 3.584 to 66.42                                                                                  | 4.918 to 56.994                                                                                                                                       |
| Index ranges                                | -44 ≤ h ≤ 44,<br>-16 ≤ k ≤ 16,<br>-27 ≤ l ≤ 27                                  | -19 ≤ h ≤ 19,<br>-13 ≤ k ≤ 11,<br>-24 ≤ l ≤ 24                                                                | -17 ≤ h ≤ 17,<br>-33 ≤ k ≤ 33,<br>-35 ≤ l ≤ 35                                                  | -28 ≤ h ≤ 28,<br>-28 ≤ k ≤ 27,<br>-23 ≤ l ≤ 23                                                                                                        |
| Reflections collected                       | 29701                                                                           | 19341                                                                                                         | 147873                                                                                          | 33705                                                                                                                                                 |
| Independent reflections                     | 10079<br>R <sub>int</sub> = 0.0416,<br>R <sub>sigma</sub> = 0.0565              | 6230<br>R <sub>int</sub> = 0.0269,<br>R <sub>sigma</sub> = 0.0300                                             | 22110<br>R <sub>int</sub> = 0.0480,<br>R <sub>sigma</sub> = 0.0320                              | 4915<br>R <sub>int</sub> = 0.0545,<br>R <sub>sigma</sub> = 0.0378                                                                                     |
| Data/restraints/parameters                  | 10079/430/544                                                                   | 6230/0/271                                                                                                    | 22110/134/704                                                                                   | 4915/68/251                                                                                                                                           |
| Goodness-of-fit on F <sup>2</sup>           | 1.047                                                                           | 1.050                                                                                                         | 1.076                                                                                           | 1.031                                                                                                                                                 |
| Final R indexes [I ≥ 2σ (I)]                | R <sub>1</sub> = 0.0420,<br>wR <sub>2</sub> = 0.0976                            | R <sub>1</sub> = 0.0269,<br>wR <sub>2</sub> = 0.0642                                                          | R <sub>1</sub> = 0.0322,<br>wR <sub>2</sub> = 0.0755                                            | R <sub>1</sub> = 0.0497,<br>wR <sub>2</sub> = 0.1301                                                                                                  |
| Final R indexes [all data]                  | R <sub>1</sub> = 0.0769,<br>wR <sub>2</sub> = 0.1094                            | R <sub>1</sub> = 0.0331,<br>wR <sub>2</sub> = 0.0667                                                          | R <sub>1</sub> = 0.0387,<br>wR <sub>2</sub> = 0.0783                                            | R <sub>1</sub> = 0.0776,<br>wR <sub>2</sub> = 0.1540                                                                                                  |
| Largest diff. peak/hole / e Å <sup>-3</sup> | 0.99/-0.46                                                                      | 0.70/-0.58                                                                                                    | 1.17/-0.60                                                                                      | 1.28/-0.85                                                                                                                                            |
| Flack parameter                             | -                                                                               | -                                                                                                             | 0.491(8)                                                                                        | -                                                                                                                                                     |
| CCDC                                        | 1878047                                                                         | 1878049                                                                                                       | 1878046                                                                                         | 1878048                                                                                                                                               |

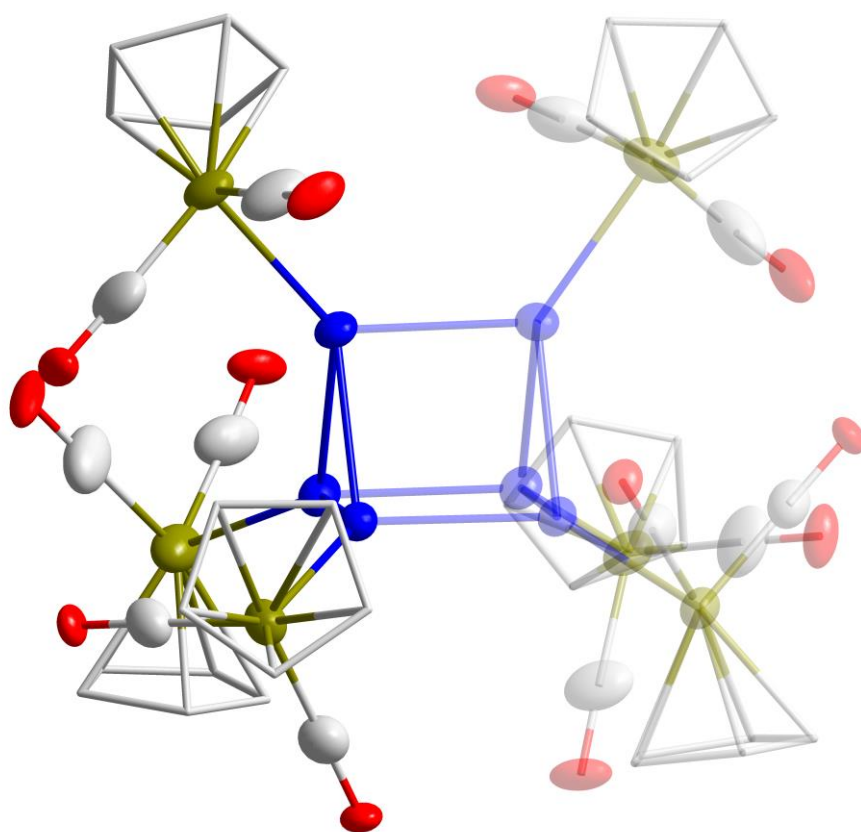

Figure S2: Molecular structure of **1**. The atoms generated by a symmetry operation are showed with 60% transparency. Symmetry operation:  $-X, Y, 1/2-Z$

### 3. Spectroscopical investigations

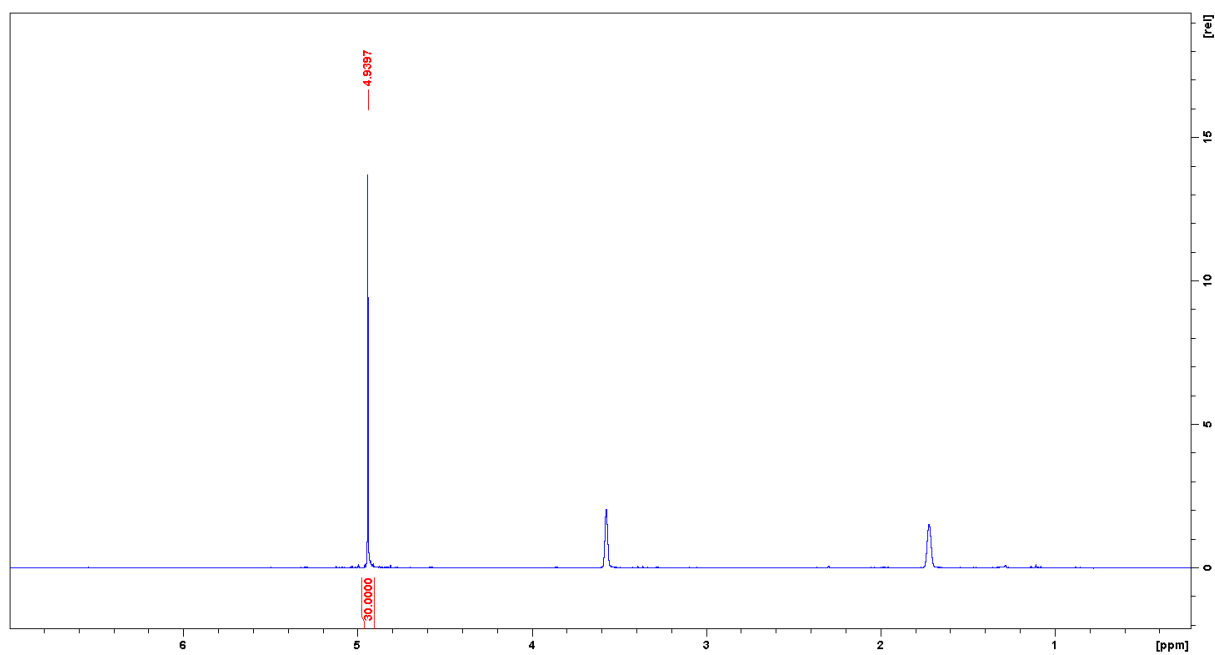

Figure S3:  $^1\text{H}$  NMR spectrum of **1**.

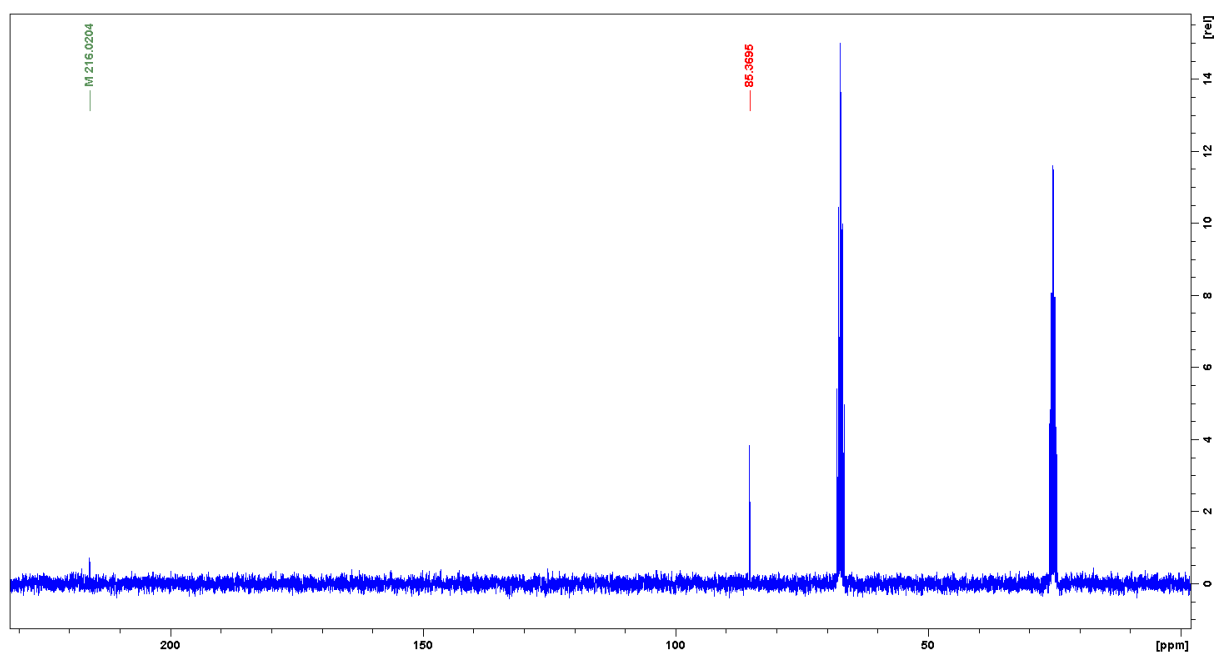

Figure S4:  $^{13}\text{C}$  NMR spectrum of **1**.



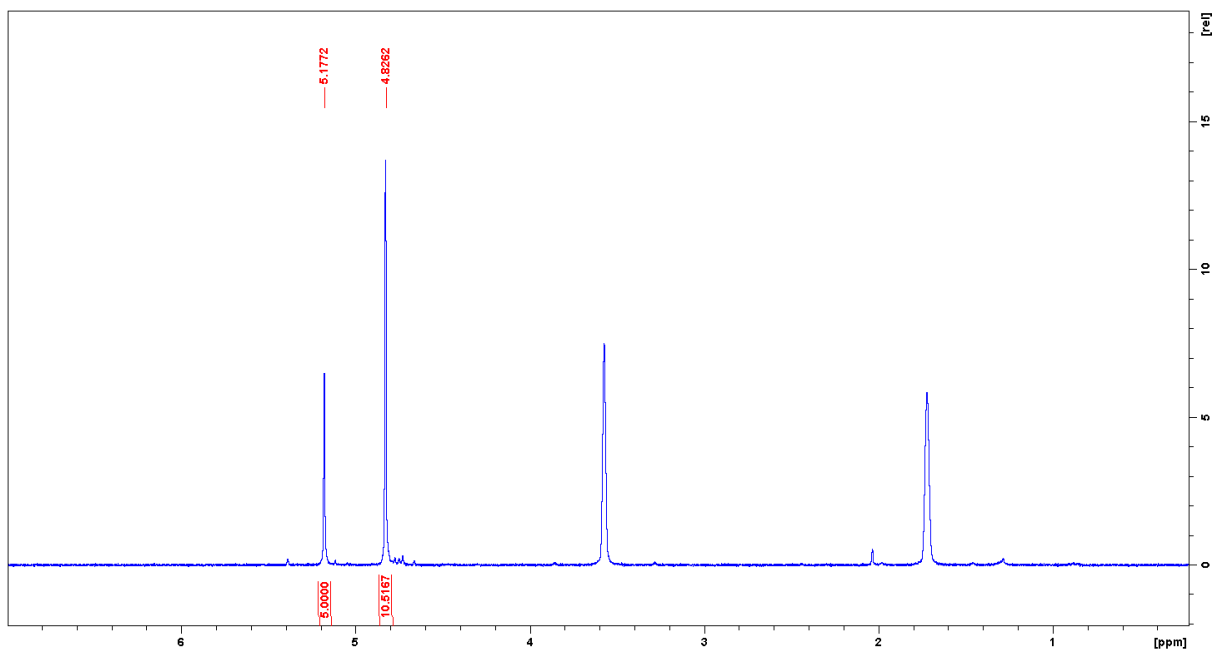

Figure S5: <sup>1</sup>H NMR spectrum of **2**.

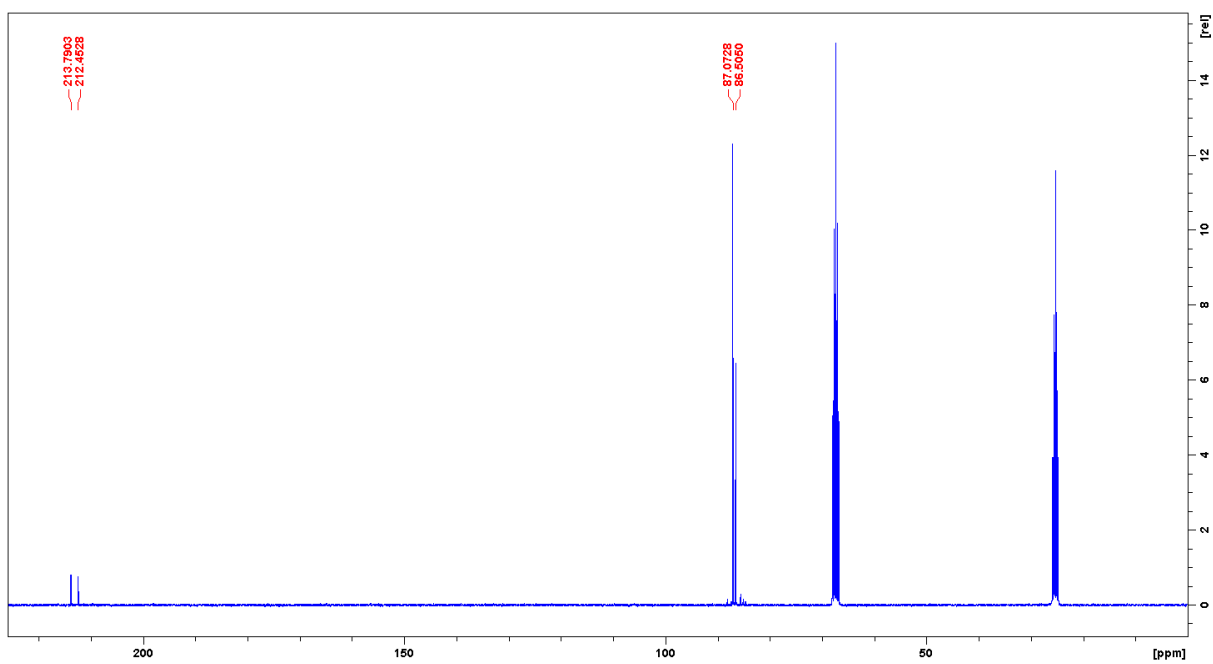

Figure S6: <sup>13</sup>C NMR spectrum of **2**.

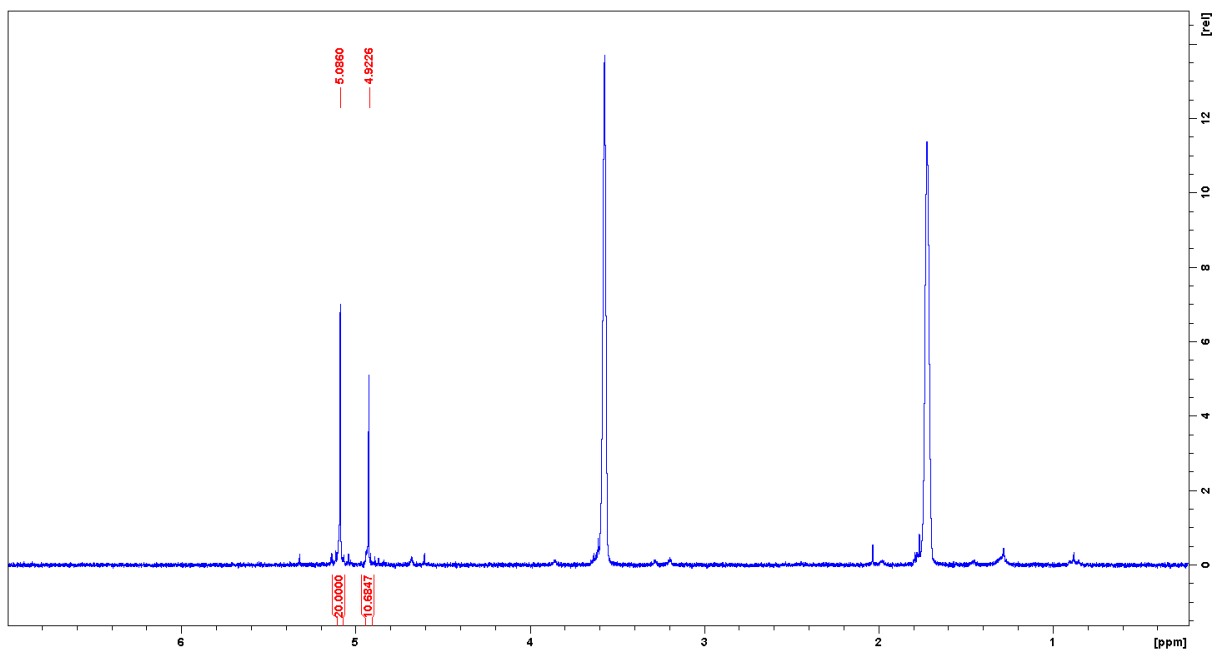

Figure S7:  $^1\text{H}$  NMR spectrum of **3**.

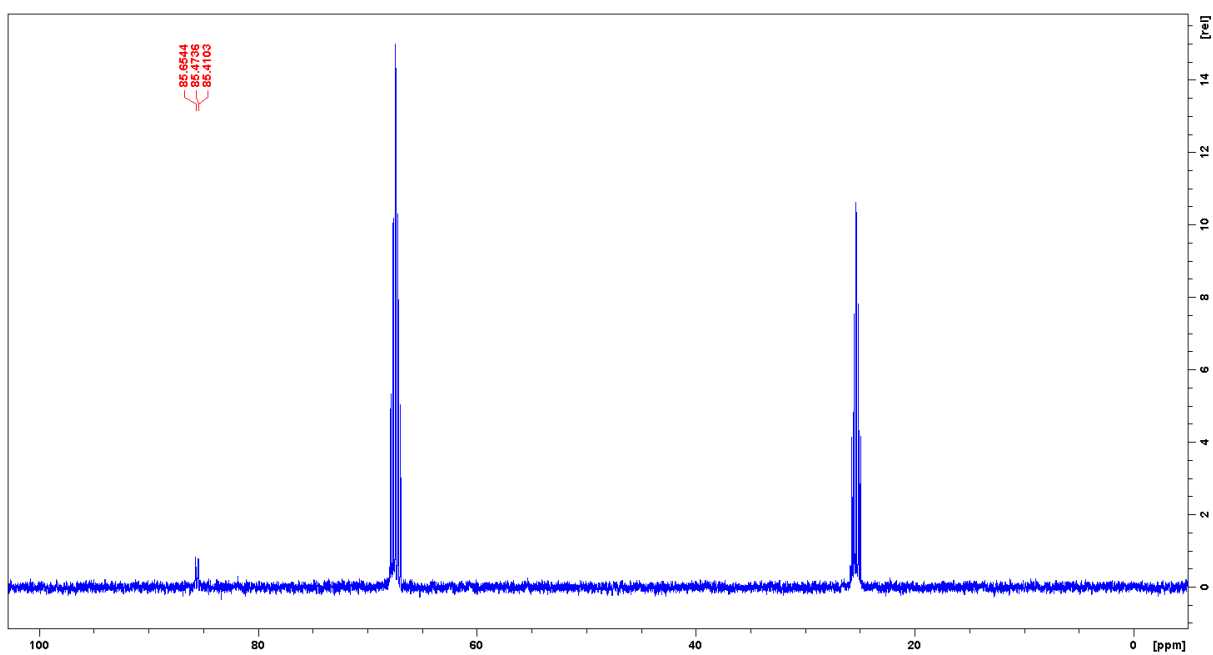

Figure S8:  $^{13}\text{C}$  NMR spectrum of **3**.

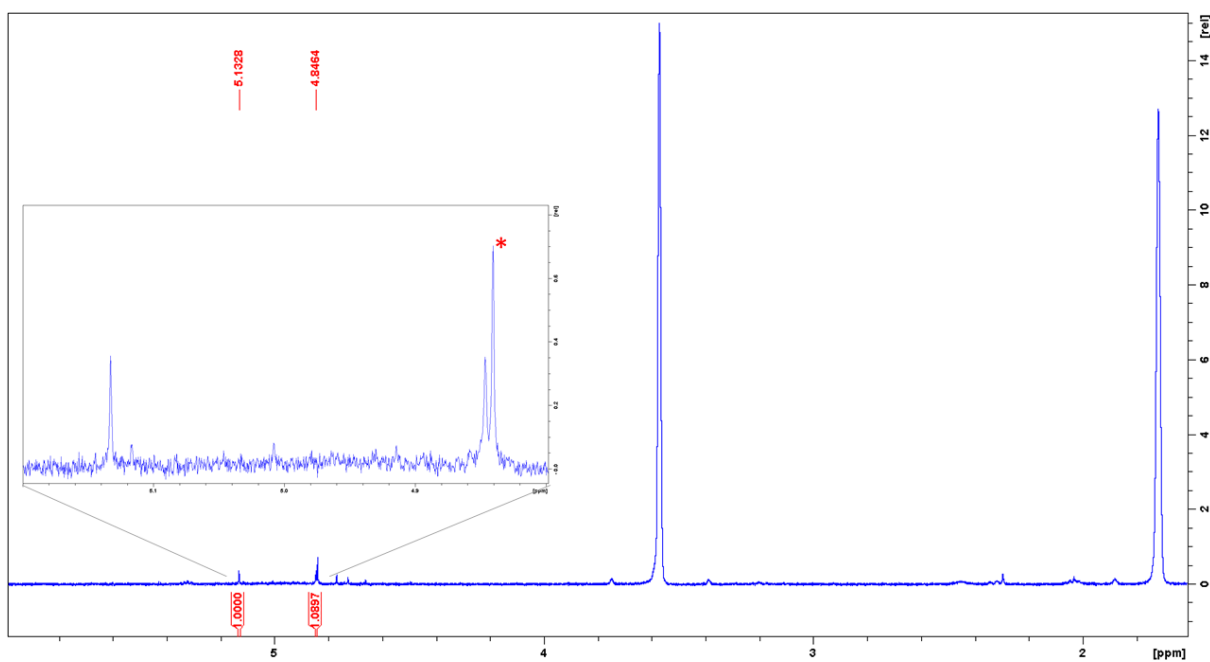

Figure S9:  $^1\text{H}$  NMR spectrum of **5**. The crystals were washed with cold toluene but it was not possible to remove all the dimer  $(\text{CO})_2\text{CpFe-FeCp}(\text{CO})_2$  (\*, singlet, 4.84 ppm).

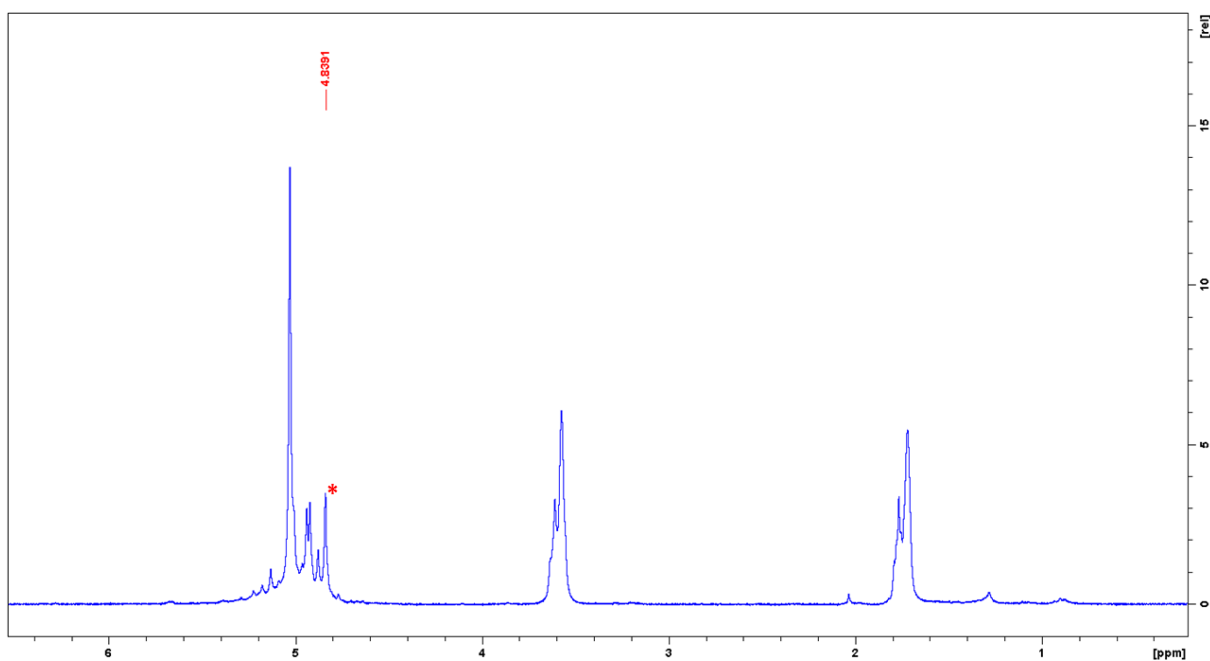

Figure S10:  $^1\text{H}$  NMR spectrum of a reaction mixture showing the presence of the side product  $(\text{CO})_2\text{CpFe-FeCp}(\text{CO})_2$  (\*, singlet, 4.84 ppm).

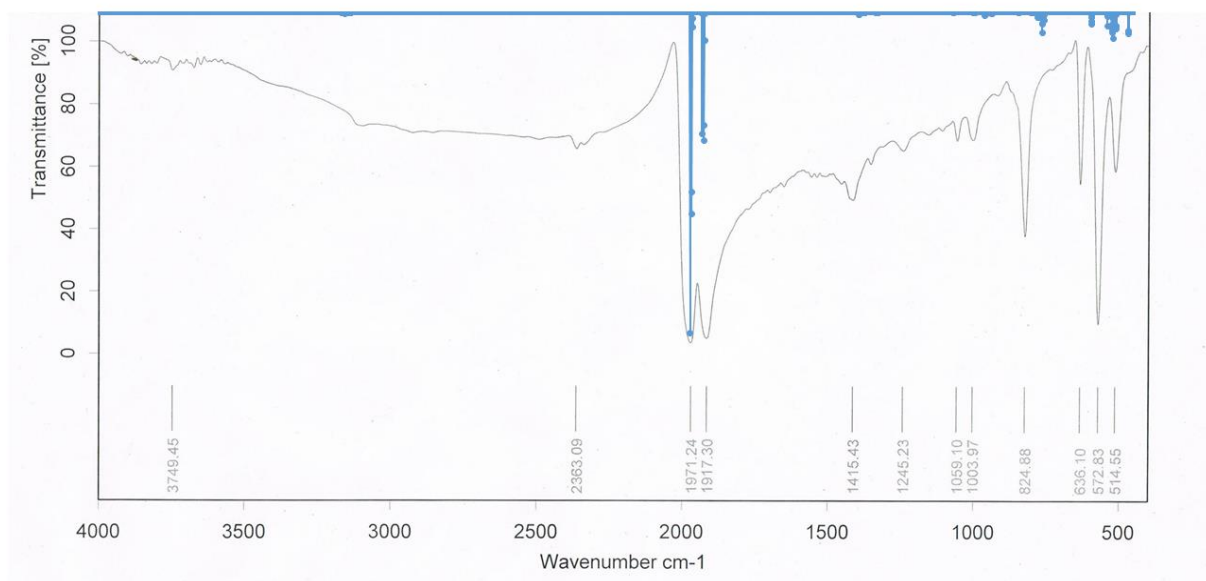

Figure S11: Measured (black) and calculated (blue) IR spectra of **1**.

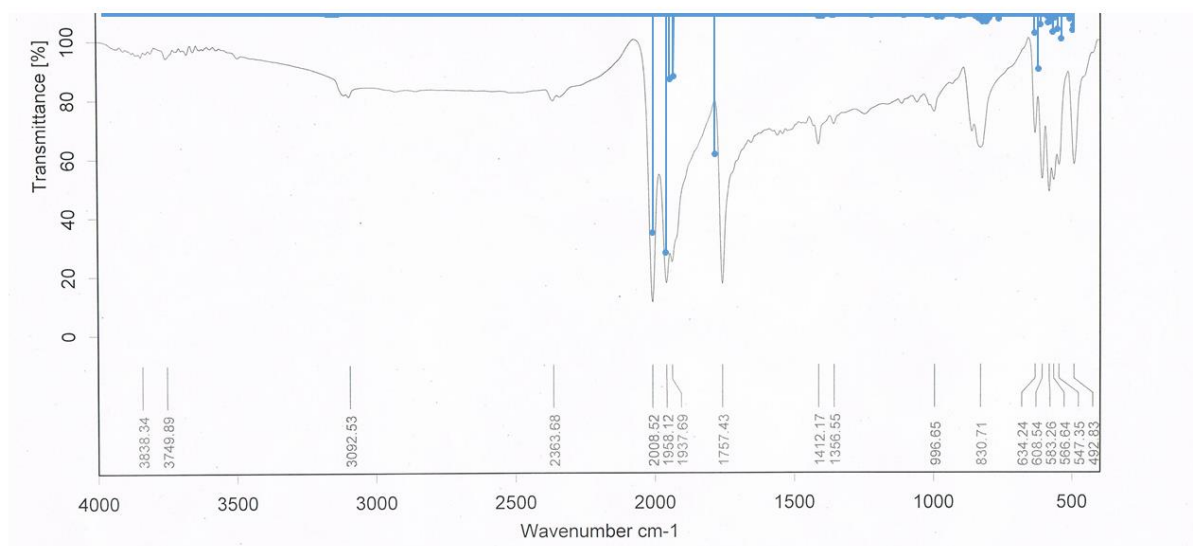

Figure S12: Measured (black) and calculated (blue) IR spectra of **2**.

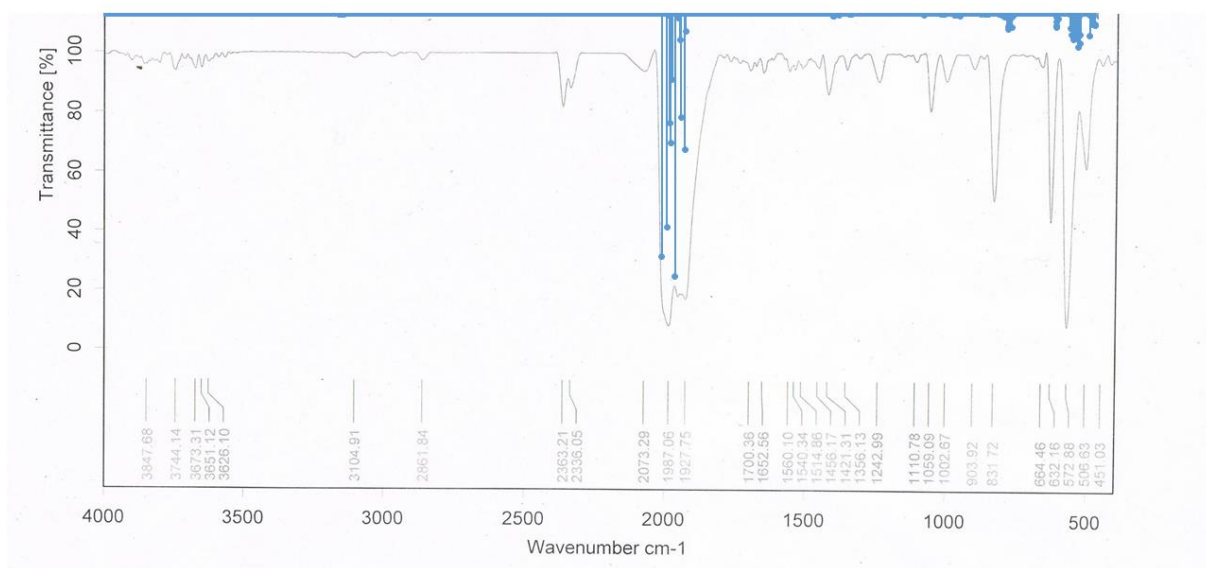

Figure S13: Measured (black) and calculated(blue) IR spectra of **3**.

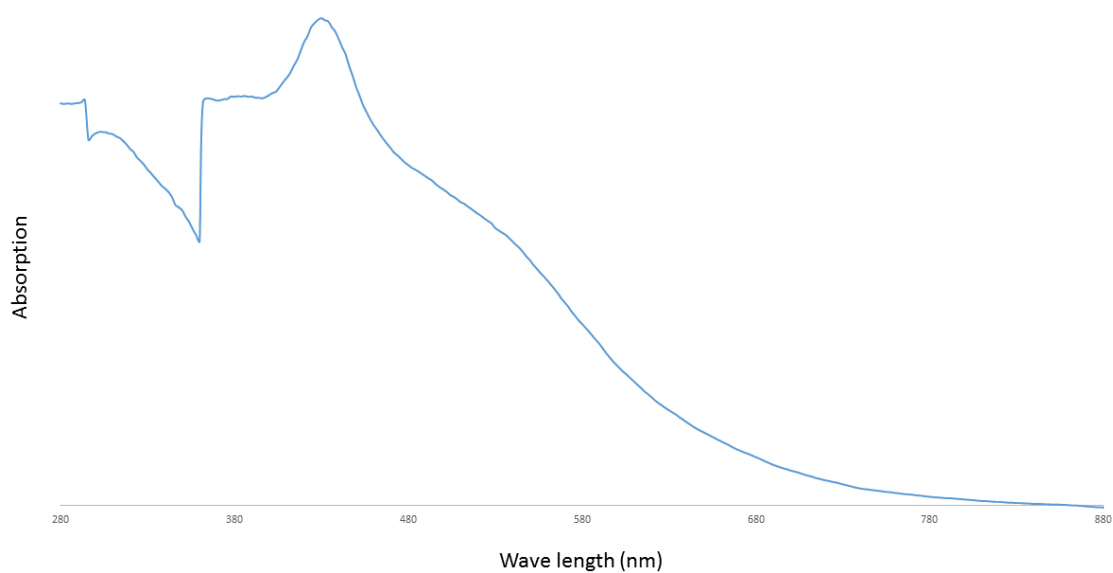

Figure S14: UV-Vis spectrum of **1** in thf solution.

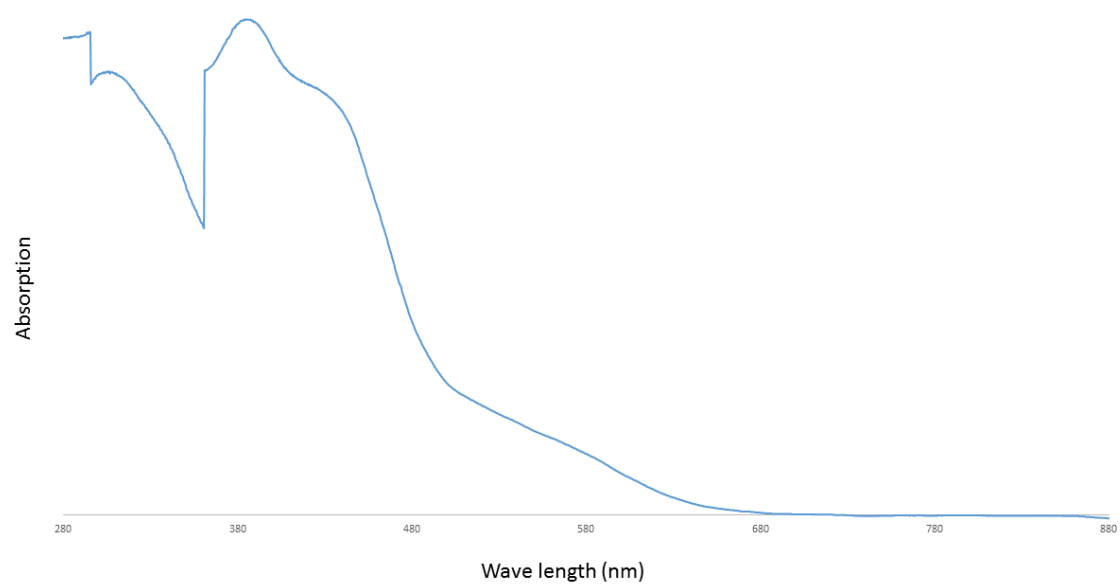

Figure S15: UV-Vis spectrum of **2**.

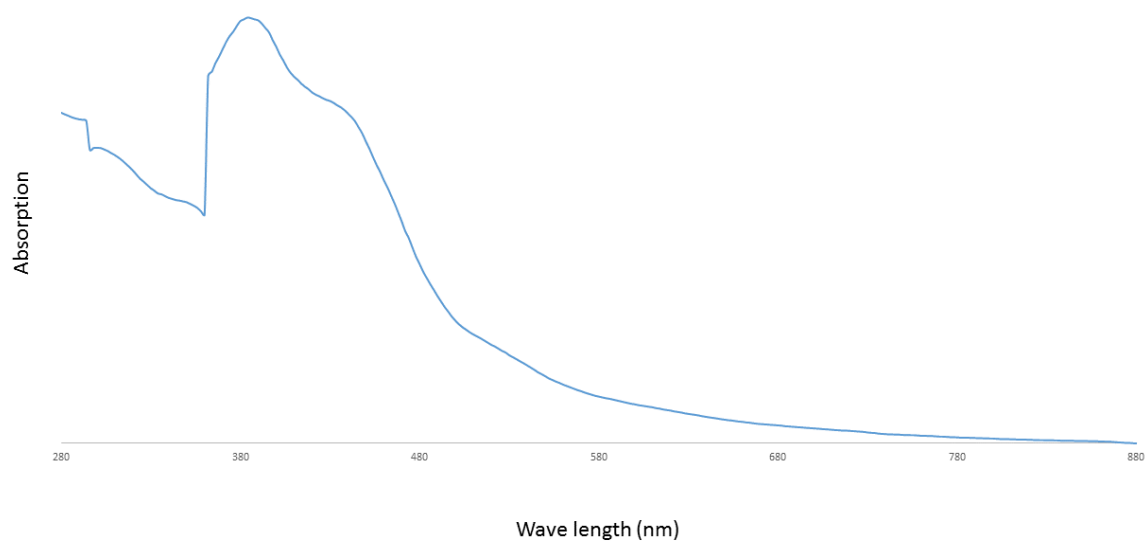

Figure S15: UV-Vis spectrum of **3**.

#### 4. Quantum chemical calculations

All quantum-chemical calculations were carried out with the RI-DFT version of the Turbomole program package and the TmoleX graphical user interface by employing the BP86-functional. The basis sets were of SVP quality.<sup>4</sup> Dispersion forces were modelled with the DFT-D3 correction implemented in TURBOMOLE.<sup>5</sup> Solvent effects were modelled with the COSMO program.<sup>6</sup> To get a reliable value for thermodynamical calculations for the Gibbs' Free Enthalpy the FREEH routine was used. All model compounds are calculated as structural optimized.

##### 4.1 Calculated Enthalpies for the Dimerization and Tetramerization of GeCl<sub>2</sub>•dioxane

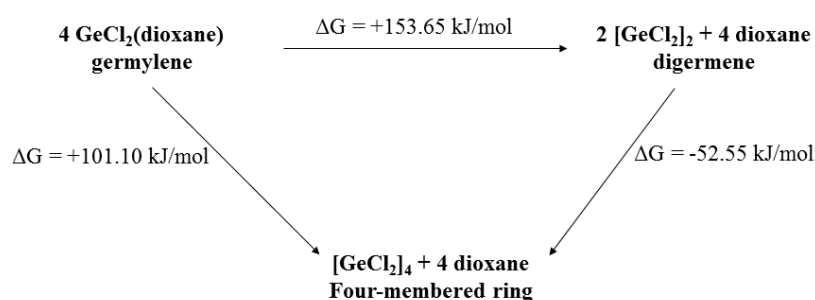

Figure S16: Monomer – Dimer and Monomer – Tetramer equilibrium of GeCl<sub>2</sub> to give the digermene or the four membered ring system and dioxane, respectively.

## 4.2 GeClFeCp(CO)<sub>2</sub>

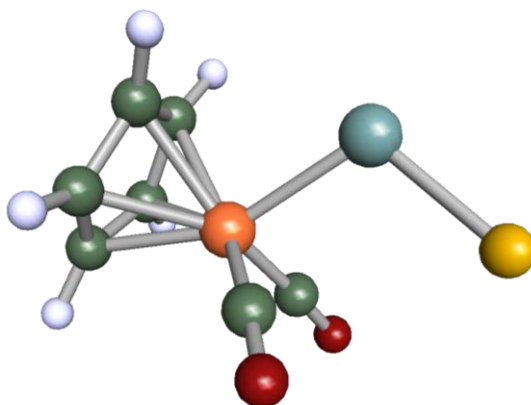

Figure S17: Optimized calculated structure of GeClFeCp(CO)<sub>2</sub>

Total energy: -4221.00597854002 H

symmetry used: C<sub>1</sub>

HOMO-LUMO gap: 1.942 eV

lowest vibrational eigenvalue: 18.95 cm<sup>-1</sup>

### Atomic coordinates:

|    |           |           |           |
|----|-----------|-----------|-----------|
| Ge | -2.271607 | 0.244007  | -1.140037 |
| Cl | -2.634185 | -1.146760 | -2.920529 |
| H  | 1.900181  | 1.809249  | -0.397353 |
| C  | -0.609286 | 0.656937  | 1.548297  |
| Fe | -0.129622 | -0.230929 | -0.339373 |
| H  | 2.498613  | -0.535715 | 0.861810  |
| C  | -0.544944 | -1.927305 | -0.415567 |
| C  | 0.440950  | -0.183835 | -1.991222 |
| H  | 0.307600  | -1.269068 | 2.309996  |
| O  | -0.762953 | -3.074052 | -0.436653 |
| H  | -1.594618 | 0.657728  | 2.033609  |
| H  | -0.601066 | 2.576574  | 0.349801  |
| C  | 1.561699  | 0.028106  | 0.951786  |
| O  | 0.884805  | -0.158919 | -3.070756 |
| C  | 1.239954  | 1.255191  | 0.283521  |
| C  | 0.405837  | -0.358698 | 1.703560  |
| C  | -0.091359 | 1.657490  | 0.669111  |





### 4.3 [GeClFeCp(CO)<sub>2</sub>]<sub>2</sub>

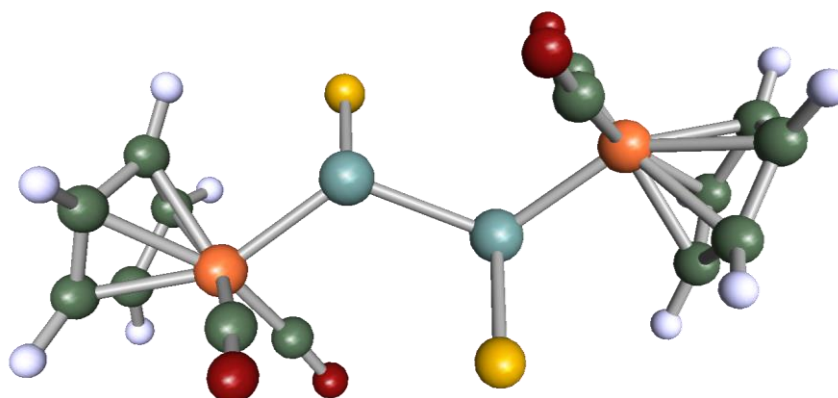

Figure S18: Optimized calculated structure of [GeClFeCp(CO)<sub>2</sub>]<sub>2</sub>

Total energy: -8442.05762351493 H

symmetry used: C<sub>1</sub>

HOMO-LUMO gap: 1.455 eV

lowest vibrational eigenvalue: 6.73 cm<sup>-1</sup>

#### Atomic coordinates:

|    |           |           |           |    |           |           |           |
|----|-----------|-----------|-----------|----|-----------|-----------|-----------|
| Ge | -0.822970 | 0.780787  | 0.414425  | C  | -2.790269 | 0.898274  | 4.083965  |
| Ge | 0.461893  | -1.082845 | -0.577680 | C  | -2.710050 | 2.390050  | 2.299376  |
| Cl | -2.823068 | 0.623278  | -0.678988 | H  | 3.991653  | -1.214841 | -1.885744 |
| Cl | 2.288941  | -0.951474 | 0.814364  | C  | 1.544410  | -2.857249 | -3.535016 |
| H  | -1.267885 | 3.810124  | 3.302085  | Fe | 1.281500  | -0.885933 | -2.775745 |
| C  | -3.272708 | 1.147488  | 2.747193  | H  | 3.565513  | -0.290092 | -4.427495 |
| Fe | -1.162752 | 0.983905  | 2.721594  | C  | -0.337771 | -0.597864 | -3.377490 |
| H  | -1.374981 | 2.063929  | 5.401243  | C  | 1.592875  | 0.788712  | -2.391329 |
| C  | -0.911642 | -0.745480 | 2.818537  | H  | 1.542053  | -1.750617 | -5.517676 |
| C  | 0.531085  | 1.384601  | 2.941195  | O  | -1.390874 | -0.413543 | -3.844871 |
| H  | -3.033816 | 0.021933  | 4.699205  | H  | 0.740207  | -3.592735 | -3.666532 |
| O  | -0.770623 | -1.893482 | 2.973200  | H  | 2.306448  | -3.296759 | -1.450233 |
| H  | -3.945491 | 0.503805  | 2.166933  | C  | 3.031541  | -1.119211 | -3.945111 |
| H  | -2.906000 | 2.871737  | 1.333025  | O  | 1.850784  | 1.912843  | -2.204598 |
| C  | -1.919370 | 1.966010  | 4.453293  | C  | 3.261591  | -1.607162 | -2.605032 |
| O  | 1.636021  | 1.686861  | 3.155920  | C  | 1.970862  | -1.883228 | -4.515779 |
| C  | -1.860597 | 2.886631  | 3.340732  | C  | 2.355043  | -2.693241 | -2.366209 |

#### 4.4 [GeClFeCp(CO)<sub>2</sub>]<sub>4</sub>

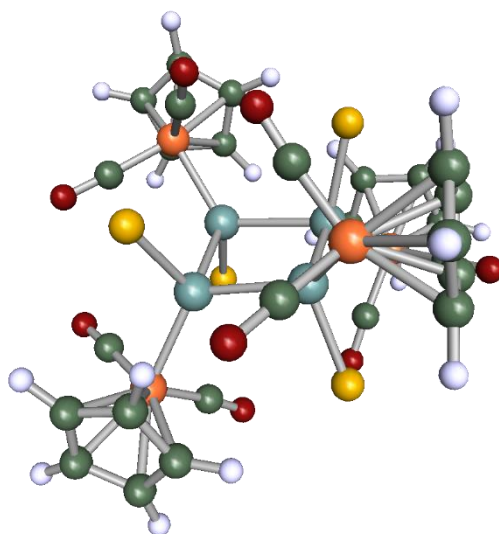

Figure S19: Optimized calculated structure of [GeClFeCp(CO)<sub>2</sub>]<sub>4</sub>

Total energy: -16884.23680625217 H

symmetry used: C<sub>1</sub>

HOMO-LUMO gap: 1.963 eV

lowest vibrational eigenvalue: 15.74 cm<sup>-1</sup>

#### Atomic coordinates:

|    |           |           |           |    |           |           |           |
|----|-----------|-----------|-----------|----|-----------|-----------|-----------|
| Ge | 1.071110  | -1.627813 | -0.108344 | C  | -1.989544 | 4.261265  | 2.595232  |
| Ge | 1.324961  | 0.855078  | -0.357300 | O  | -0.918060 | 0.989844  | 3.689156  |
| Ge | -1.158162 | 1.121492  | -0.146633 | C  | -0.890145 | 4.164762  | 1.660853  |
| Ge | -1.414679 | -1.359863 | -0.173489 | C  | -3.207563 | 4.254188  | 1.850982  |
| Cl | -2.063921 | -1.837961 | 1.952688  | C  | -1.443206 | 4.104449  | 0.341091  |
| Cl | -1.790346 | 1.757291  | -2.245749 | H  | 3.720855  | -4.687613 | 0.049623  |
| Cl | 1.542483  | -2.461896 | -2.179634 | C  | 4.084636  | -1.673819 | 1.537860  |
| Cl | 2.109643  | 1.523026  | 1.685247  | Fe | 2.250954  | -2.745003 | 1.576557  |
| H  | 0.173707  | 4.112012  | 1.927499  | H  | 3.846659  | -4.820662 | 2.782741  |
| C  | -2.872923 | 4.145234  | 0.450740  | C  | 1.388807  | -1.851631 | 2.816858  |
| Fe | -2.142365 | 2.464518  | 1.494362  | C  | 1.065133  | -4.015497 | 1.469423  |
| H  | -1.899120 | 4.313933  | 3.688153  | H  | 4.108578  | -2.279872 | 3.722944  |
| C  | -3.551736 | 1.436514  | 1.380696  | O  | 0.898874  | -1.308177 | 3.721369  |
| C  | -1.388140 | 1.521734  | 2.767102  | H  | 4.148375  | -0.578933 | 1.584742  |
| H  | -4.221644 | 4.300431  | 2.268950  | H  | 3.972730  | -2.089283 | -0.681858 |
| O  | -4.517499 | 0.784706  | 1.335323  | C  | 3.911906  | -3.908810 | 2.175219  |
| H  | -3.579847 | 4.092872  | -0.386925 | O  | 0.295111  | -4.894080 | 1.416488  |
| H  | -0.888361 | 4.049870  | -0.602545 | C  | 3.844806  | -3.838852 | 0.734607  |

|    |          |           |           |    |           |           |           |
|----|----------|-----------|-----------|----|-----------|-----------|-----------|
| C  | 4.051397 | -2.574652 | 2.666613  | C  | 1.982295  | 3.711508  | -1.087228 |
| C  | 3.965438 | -2.463309 | 0.348271  | H  | -0.679019 | -4.475176 | -2.207538 |
| H  | 0.358198 | 3.713462  | -2.666049 | C  | -3.693703 | -4.014810 | -0.745435 |
| C  | 3.408225 | 3.606993  | -1.200843 | Fe | -2.694710 | -2.471001 | -1.777222 |
| Fe | 2.513731 | 1.910504  | -2.076856 | H  | -2.755734 | -4.317501 | -3.982858 |
| H  | 2.425476 | 3.558534  | -4.438127 | C  | -3.897016 | -1.216225 | -1.594938 |
| C  | 3.799059 | 0.775775  | -1.775141 | C  | -1.846548 | -1.649557 | -3.074205 |
| C  | 1.711410 | 0.916149  | -3.281563 | H  | -5.047534 | -3.929948 | -2.565966 |
| H  | 4.750196 | 3.462994  | -3.025709 | O  | -4.726094 | -0.400613 | -1.503032 |
| O  | 4.690791 | 0.042236  | -1.589769 | H  | -4.385144 | -3.852558 | 0.091263  |
| H  | 4.114760 | 3.568281  | -0.362032 | H  | -1.712165 | -4.267061 | 0.304625  |
| H  | 1.433784 | 3.793721  | -0.141628 | C  | -2.837942 | -4.259459 | -2.889429 |
| C  | 2.520886 | 3.602284  | -3.345187 | O  | -1.337215 | -1.177982 | -4.008690 |
| O  | 1.222533 | 0.330777  | -4.160053 | C  | -1.740389 | -4.356521 | -1.953519 |
| C  | 1.425143 | 3.699150  | -2.406984 | C  | -4.040627 | -4.055216 | -2.146812 |
| C  | 3.740101 | 3.551448  | -2.605102 | C  | -2.277509 | -4.215193 | -0.633440 |

#### 4.5 GeCl<sub>2</sub>•dioxane

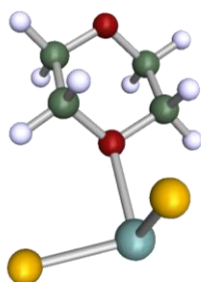

Figure S20: Optimized calculated structure of GeCl<sub>2</sub>•dioxane

Total energy: -3304.81221156187 H

symmetry used: C<sub>1</sub>

HOMO-LUMO gap: 4.326 eV

lowest vibrational eigenvalue: 46.18 cm<sup>-1</sup>

#### Atomic coordinates:

|   |           |           |           |    |           |           |           |
|---|-----------|-----------|-----------|----|-----------|-----------|-----------|
| C | 1.427872  | -0.953644 | 0.389564  | H  | 0.113078  | -0.997374 | -1.364708 |
| O | 2.021375  | 0.312641  | 0.110402  | H  | 2.100780  | -1.733115 | -0.025428 |
| C | 1.190839  | 1.363837  | 0.592421  | H  | 1.681684  | 2.323795  | 0.327310  |
| C | -0.191775 | 1.308337  | -0.046972 | H  | -0.869218 | 2.072392  | 0.388182  |
| O | -0.795627 | 0.008455  | 0.234317  | Ge | -2.949045 | 0.009266  | -0.193337 |
| C | 0.054827  | -1.075836 | -0.256879 | H  | -0.454453 | -2.017483 | 0.026151  |
| H | 1.335930  | -1.107731 | 1.493849  | Cl | -3.124312 | -2.226098 | 0.205978  |
| H | 1.088029  | 1.305682  | 1.704893  | Cl | -2.495431 | -0.033019 | -2.434960 |
| H | -0.134553 | 1.439894  | -1.150783 |    |           |           |           |

## 4.6 Ge<sub>2</sub>Cl<sub>4</sub>

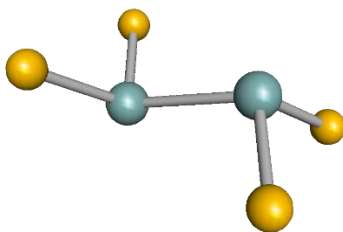

Figure S21: Optimized calculated structure of Ge<sub>2</sub>Cl<sub>4</sub>

Total energy: -5994.67425072436 H

symmetry used: C<sub>1</sub>

HOMO-LUMO gap: 2.031 eV

lowest vibrational eigenvalue: 21.33 cm<sup>-1</sup>

Atomic coordinates:

```
Ge -1.267386 -0.409825 -0.213260
Ge 1.265442 0.405340 0.202209
Cl -2.481591 0.572919 1.354674
Cl -1.928811 0.577194 -2.080450
Cl 1.925473 -0.550868 2.085209
Cl 2.486872 -0.594759 -1.348382
```

## 4.7 Ge<sub>4</sub>Cl<sub>8</sub>

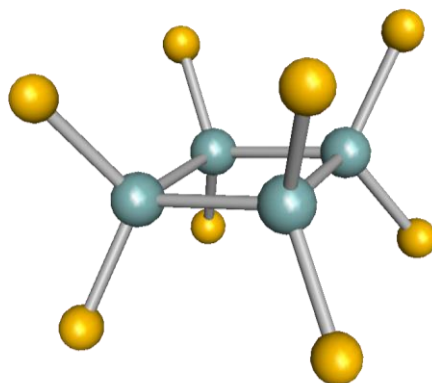

Figure S22: Optimized calculated structure of Ge<sub>4</sub>Cl<sub>8</sub>

Total energy: -11989.39727989250 H

symmetry used: C<sub>1</sub>

HOMO-LUMO gap: 2.165 eV

lowest vibrational eigenvalue: 6.13 cm<sup>-1</sup>

### Atomic coordinates:

```
Ge 1.241713 -1.249818 0.001663
Ge 1.245808 1.249548 -0.001711
Ge -1.253654 1.253411 0.004033
Ge -1.257745 -1.246140 -0.003567
Cl -2.126372 -2.114247 1.787772
Cl -2.111337 -2.096523 -1.810724
Cl -2.104744 2.105442 1.811612
Cl -2.120887 2.123744 -1.786916
Cl 2.094963 -2.105942 1.806268
Cl 2.106800 -2.115905 -1.792397
Cl 2.100609 2.103515 -1.806584
Cl 2.113266 2.113895 1.792024
```

## 4.8 Ge<sub>6</sub>[FeCp(CO)<sub>2</sub>]<sub>6</sub> 1

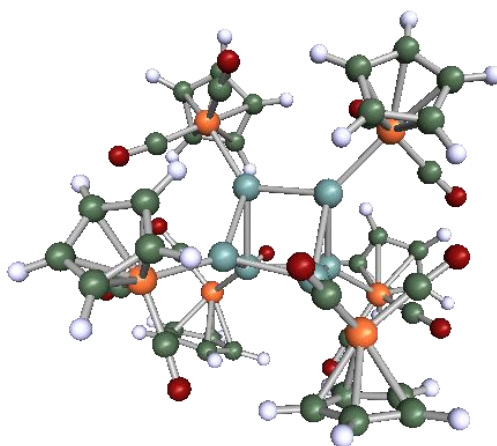

Figure S23: Optimized calculated structure of Ge<sub>6</sub>[FeCp(CO)<sub>2</sub>]<sub>6</sub> 1

Total energy: 23485.44271627712 H

symmetry used: C<sub>1</sub>

HOMO-LUMO gap: 1.463 eV

lowest vibrational eigenvalue: 23.16 cm<sup>-1</sup>

Atomic coordinates:

|    |           |           |           |   |           |           |           |
|----|-----------|-----------|-----------|---|-----------|-----------|-----------|
| Ge | 0.409807  | -2.527528 | -0.173999 | C | -3.850265 | -1.166394 | -1.628853 |
| Ge | -0.755894 | -0.531786 | -         | C | -4.237866 | 0.042267  | -2.295177 |
|    | 1.194764  |           |           | C | -4.332204 | -0.239682 | -3.708573 |
| Ge | 1.474811  | -0.623331 | 1.150005  | C | -3.992608 | -1.610656 | -3.907443 |
| Fe | -0.670385 | -4.567536 | 0.567135  | C | -3.689152 | -2.188295 | -2.618219 |
| Cl | 1.944515  | -3.332755 | -1.690489 | C | -1.150475 | -1.499032 | -3.930363 |
| Ge | -0.803836 | 0.533207  | 1.166088  | C | -1.722711 | 0.960269  | -3.537151 |
| Ge | 1.519557  | 0.624753  | -1.087392 | C | 1.783672  | -0.592184 | 4.374844  |
| Fe | -2.351826 | -0.586123 | -         | C | 4.145661  | 0.414401  | 1.770340  |
|    | 3.043267  |           |           | C | 2.763152  | -1.594160 | 4.666132  |
| Fe | 3.246173  | -0.664803 | 2.815807  | C | 4.052730  | -0.951645 | 4.755661  |
| C  | 1.218704  | -4.974707 | 1.494741  | C | 3.854115  | 0.442214  | 4.510115  |
| C  | 0.861138  | -6.036008 | 0.602124  | C | 2.451651  | 0.671868  | 4.266823  |
| C  | -0.382232 | -6.611537 | 1.060115  | C | 3.841877  | -2.131969 | 2.076981  |
| C  | -0.795320 | -5.889234 | 2.219022  | H | 2.133719  | -4.372351 | 1.425697  |
| C  | 0.190349  | -4.867555 | 2.488151  | H | 1.436803  | -6.342822 | -0.280803 |
| C  | -2.109853 | -3.670867 | 0.955884  | H | -0.917120 | -7.448955 | 0.592507  |
| C  | -1.164589 | -4.805292 | -1.090925 | H | -1.708203 | -6.069751 | 2.802645  |
| Ge | 0.403251  | 2.528176  | 0.193587  | H | 0.144282  | -4.133587 | 3.303146  |
| Fe | -2.473891 | 0.591552  | 2.948438  | O | -3.122787 | -3.137129 | 1.207700  |
| Fe | 3.357522  | 0.668527  | -2.679427 | O | -1.543813 | -5.016920 | -2.176165 |

|    |           |           |           |   |           |           |           |
|----|-----------|-----------|-----------|---|-----------|-----------|-----------|
| Fe | -0.651701 | 4.563427  | -0.593592 | O | -1.487851 | -1.979392 | 3.891454  |
| Cl | 1.882039  | 3.336400  | 1.762169  | C | 2.954191  | 1.594256  | -4.550610 |
| C  | 1.274293  | 4.977356  | -1.439266 | C | 4.244647  | 0.948323  | -4.585115 |
| C  | 0.866985  | 6.045836  | -0.576981 | C | 4.032294  | -0.444409 | -4.344496 |
| C  | -0.359190 | 6.604631  | -1.097597 | C | 2.620488  | -0.669788 | -4.158814 |
| C  | -0.712730 | 5.864484  | -2.265004 | C | 1.960812  | 0.595617  | -4.297604 |
| C  | 0.293305  | 4.849340  | -2.477080 | C | 3.919929  | 2.138027  | -1.919195 |
| C  | -2.075012 | 3.663804  | -1.030817 | C | 4.216229  | -0.407780 | -1.597269 |
| C  | -1.209079 | 4.806079  | 1.043654  | H | 2.767662  | 2.666264  | -4.701166 |
| H  | 2.190140  | 4.384028  | -1.321487 | H | 5.211310  | 1.438418  | -4.761586 |
| H  | 1.399192  | 6.368935  | 0.327142  | H | 4.813465  | -1.215202 | -4.292649 |
| H  | -0.922016 | 7.442630  | -0.665063 | H | 2.144122  | -1.630857 | -3.924681 |
| H  | -1.599838 | 6.028830  | -2.891406 | H | 0.882261  | 0.774567  | -4.229613 |
| H  | 0.291393  | 4.106214  | -3.285179 | O | 4.326182  | 3.149012  | -1.498710 |
| O  | -3.077641 | 3.128262  | -1.317737 | O | 4.863394  | -1.130165 | -0.952883 |
| O  | -1.630968 | 5.019331  | 2.112692  | H | -3.693995 | -1.295706 | -0.551083 |
| C  | -4.478884 | 0.243854  | 3.535205  | H | -4.419804 | 1.018959  | -1.829529 |
| C  | -4.151083 | 1.617052  | 3.738811  | H | -3.380869 | -3.225714 | -2.436284 |
| C  | -3.796944 | 2.187060  | 2.459170  | H | -4.610218 | 0.479506  | -4.490563 |
| C  | -3.914729 | 1.158241  | 1.470929  | H | -3.962320 | -2.137891 | -4.870542 |
| C  | -4.325848 | -0.047187 | 2.128776  | O | -0.408829 | -2.112420 | -4.589286 |
| C  | -1.311726 | 1.512944  | 3.878315  | O | -1.334531 | 1.990147  | -3.937026 |
| C  | -1.861703 | -0.951330 | 3.473520  | H | 0.708451  | -0.768336 | 4.261909  |
| H  | -4.786605 | -0.471015 | 4.310017  | H | 2.567600  | -2.665988 | 4.805998  |
| H  | -4.161371 | 2.150506  | 4.698863  | H | 1.987649  | 1.634636  | 4.015734  |
| H  | -3.484498 | 3.224189  | 2.282809  | H | 5.010152  | -1.444508 | 4.970875  |
| H  | -3.714428 | 1.281130  | 0.399786  | H | 4.638846  | 1.211062  | 4.493064  |
| H  | -4.485370 | -1.027582 | 1.662640  | O | 4.816254  | 1.138436  | 1.152284  |
| O  | -0.598187 | 2.132336  | 4.562132  | O | 4.266264  | -3.141595 | 1.671291  |

### Vibrational analysis:

| #  |   | cm** (-1) | km/mol  | IR  | RAMAN |
|----|---|-----------|---------|-----|-------|
| 1  |   | -0.00     | 0.00000 | -   | -     |
| 2  |   | -0.00     | 0.00000 | -   | -     |
| 3  |   | -0.00     | 0.00000 | -   | -     |
| 4  |   | -0.00     | 0.00000 | -   | -     |
| 5  |   | -0.00     | 0.00000 | -   | -     |
| 6  |   | 0.00      | 0.00000 | -   | -     |
| 7  | a | 23.16     | 0.10805 | YES | YES   |
| 8  | a | 24.71     | 0.24406 | YES | YES   |
| 9  | a | 25.65     | 0.07956 | YES | YES   |
| 10 | a | 27.36     | 0.13672 | YES | YES   |
| 11 | a | 29.71     | 0.06393 | YES | YES   |
| 12 | a | 33.13     | 0.41939 | YES | YES   |
| 13 | a | 35.67     | 0.21347 | YES | YES   |
| 14 | a | 36.37     | 0.34878 | YES | YES   |
| 15 | a | 40.85     | 0.07446 | YES | YES   |
| 16 | a | 41.83     | 0.40656 | YES | YES   |
| 17 | a | 43.08     | 0.02860 | YES | YES   |
| 18 | a | 43.95     | 0.06342 | YES | YES   |
| 19 | a | 45.74     | 0.12886 | YES | YES   |
| 20 | a | 46.91     | 0.17875 | YES | YES   |
| 21 | a | 47.14     | 0.44345 | YES | YES   |



|    |   |        |          |     |     |
|----|---|--------|----------|-----|-----|
| 22 | a | 47.87  | 0.16617  | YES | YES |
| 23 | a | 48.15  | 0.27173  | YES | YES |
| 24 | a | 51.24  | 0.11156  | YES | YES |
| 25 | a | 52.79  | 0.06525  | YES | YES |
| 26 | a | 53.90  | 0.13372  | YES | YES |
| 27 | a | 56.01  | 0.14826  | YES | YES |
| 28 | a | 57.30  | 0.36995  | YES | YES |
| 29 | a | 58.08  | 0.64795  | YES | YES |
| 30 | a | 60.80  | 0.28465  | YES | YES |
| 31 | a | 65.61  | 0.02950  | YES | YES |
| 32 | a | 65.83  | 0.10053  | YES | YES |
| 33 | a | 69.28  | 0.01542  | YES | YES |
| 34 | a | 69.38  | 0.14903  | YES | YES |
| 35 | a | 72.78  | 0.74770  | YES | YES |
| 36 | a | 72.92  | 0.69789  | YES | YES |
| 37 | a | 74.36  | 0.01208  | YES | YES |
| 38 | a | 76.63  | 0.10018  | YES | YES |
| 39 | a | 77.87  | 0.47847  | YES | YES |
| 40 | a | 79.08  | 0.34901  | YES | YES |
| 41 | a | 80.45  | 0.08339  | YES | YES |
| 42 | a | 82.53  | 0.18963  | YES | YES |
| 43 | a | 84.07  | 0.59617  | YES | YES |
| 44 | a | 86.14  | 0.06007  | YES | YES |
| 45 | a | 92.15  | 2.10913  | YES | YES |
| 46 | a | 99.77  | 0.48892  | YES | YES |
| 47 | a | 99.99  | 0.81022  | YES | YES |
| 48 | a | 103.33 | 0.99247  | YES | YES |
| 49 | a | 104.62 | 0.58847  | YES | YES |
| 50 | a | 105.62 | 1.02501  | YES | YES |
| 51 | a | 109.39 | 0.48654  | YES | YES |
| 52 | a | 110.23 | 4.93924  | YES | YES |
| 53 | a | 111.48 | 0.38593  | YES | YES |
| 54 | a | 115.71 | 0.21183  | YES | YES |
| 55 | a | 117.93 | 0.00321  | YES | YES |
| 56 | a | 121.09 | 0.62911  | YES | YES |
| 57 | a | 121.73 | 0.07296  | YES | YES |
| 58 | a | 121.88 | 1.34100  | YES | YES |
| 59 | a | 128.44 | 0.16375  | YES | YES |
| 60 | a | 132.89 | 0.92927  | YES | YES |
| 61 | a | 134.99 | 0.02705  | YES | YES |
| 62 | a | 136.95 | 0.20675  | YES | YES |
| 63 | a | 140.02 | 0.03623  | YES | YES |
| 64 | a | 140.99 | 0.26179  | YES | YES |
| 65 | a | 145.62 | 7.14771  | YES | YES |
| 66 | a | 145.78 | 0.11092  | YES | YES |
| 67 | a | 151.83 | 0.55821  | YES | YES |
| 68 | a | 152.36 | 0.64474  | YES | YES |
| 69 | a | 159.96 | 1.21017  | YES | YES |
| 70 | a | 167.76 | 7.08542  | YES | YES |
| 71 | a | 169.72 | 4.57540  | YES | YES |
| 72 | a | 176.74 | 13.56798 | YES | YES |
| 73 | a | 182.55 | 3.33455  | YES | YES |
| 74 | a | 187.32 | 2.04555  | YES | YES |
| 75 | a | 201.26 | 2.40676  | YES | YES |
| 76 | a | 203.20 | 1.72646  | YES | YES |
| 77 | a | 214.61 | 18.47288 | YES | YES |

|     |   |        |           |     |     |
|-----|---|--------|-----------|-----|-----|
| 78  | a | 250.91 | 0.29706   | YES | YES |
| 79  | a | 259.96 | 10.59343  | YES | YES |
| 80  | a | 262.15 | 17.25135  | YES | YES |
| 81  | a | 264.31 | 13.06237  | YES | YES |
| 82  | a | 280.42 | 2.43824   | YES | YES |
| 83  | a | 306.85 | 49.42197  | YES | YES |
| 84  | a | 313.00 | 18.74604  | YES | YES |
| 85  | a | 341.62 | 2.42106   | YES | YES |
| 86  | a | 341.91 | 1.71607   | YES | YES |
| 87  | a | 344.88 | 3.97936   | YES | YES |
| 88  | a | 345.72 | 3.88062   | YES | YES |
| 89  | a | 346.12 | 1.10742   | YES | YES |
| 90  | a | 347.20 | 1.74267   | YES | YES |
| 91  | a | 360.53 | 6.78923   | YES | YES |
| 92  | a | 361.02 | 2.42055   | YES | YES |
| 93  | a | 361.93 | 3.76118   | YES | YES |
| 94  | a | 362.85 | 0.81058   | YES | YES |
| 95  | a | 363.77 | 3.57009   | YES | YES |
| 96  | a | 364.89 | 1.69183   | YES | YES |
| 97  | a | 369.22 | 2.75978   | YES | YES |
| 98  | a | 370.29 | 2.35811   | YES | YES |
| 99  | a | 371.44 | 1.75262   | YES | YES |
| 100 | a | 371.64 | 3.41751   | YES | YES |
| 101 | a | 376.65 | 0.76169   | YES | YES |
| 102 | a | 377.50 | 1.23147   | YES | YES |
| 103 | a | 441.24 | 1.38619   | YES | YES |
| 104 | a | 441.78 | 0.43722   | YES | YES |
| 105 | a | 447.00 | 0.30497   | YES | YES |
| 106 | a | 447.50 | 0.84522   | YES | YES |
| 107 | a | 452.14 | 1.14194   | YES | YES |
| 108 | a | 452.42 | 0.82716   | YES | YES |
| 109 | a | 499.02 | 10.61370  | YES | YES |
| 110 | a | 500.64 | 0.66317   | YES | YES |
| 111 | a | 500.73 | 9.43947   | YES | YES |
| 112 | a | 501.73 | 0.28476   | YES | YES |
| 113 | a | 502.38 | 2.26718   | YES | YES |
| 114 | a | 502.86 | 2.97486   | YES | YES |
| 115 | a | 513.18 | 43.18778  | YES | YES |
| 116 | a | 514.01 | 39.01787  | YES | YES |
| 117 | a | 522.65 | 40.77963  | YES | YES |
| 118 | a | 524.07 | 27.70503  | YES | YES |
| 119 | a | 531.99 | 80.62672  | YES | YES |
| 120 | a | 533.19 | 6.94461   | YES | YES |
| 121 | a | 565.74 | 77.73036  | YES | YES |
| 122 | a | 567.20 | 108.97657 | YES | YES |
| 123 | a | 569.25 | 9.40600   | YES | YES |
| 124 | a | 569.34 | 8.08215   | YES | YES |
| 125 | a | 569.59 | 2.37704   | YES | YES |
| 126 | a | 569.62 | 4.33038   | YES | YES |
| 127 | a | 573.15 | 123.40513 | YES | YES |
| 128 | a | 574.27 | 84.58917  | YES | YES |
| 129 | a | 577.45 | 0.61443   | YES | YES |
| 130 | a | 577.67 | 1.75469   | YES | YES |
| 131 | a | 578.40 | 67.35923  | YES | YES |
| 132 | a | 579.19 | 90.92657  | YES | YES |
| 133 | a | 579.57 | 28.30308  | YES | YES |

|     |   |        |          |     |     |
|-----|---|--------|----------|-----|-----|
| 134 | a | 580.87 | 85.54939 | YES | YES |
| 135 | a | 581.90 | 33.75424 | YES | YES |
| 136 | a | 583.46 | 3.53934  | YES | YES |
| 137 | a | 587.83 | 97.00657 | YES | YES |
| 138 | a | 588.35 | 26.76263 | YES | YES |
| 139 | a | 589.53 | 88.71046 | YES | YES |
| 140 | a | 591.67 | 0.83409  | YES | YES |
| 141 | a | 594.02 | 12.35798 | YES | YES |
| 142 | a | 594.83 | 78.26460 | YES | YES |
| 143 | a | 600.10 | 54.94116 | YES | YES |
| 144 | a | 601.32 | 2.17245  | YES | YES |
| 145 | a | 643.33 | 21.55225 | YES | YES |
| 146 | a | 649.04 | 8.05463  | YES | YES |
| 147 | a | 649.62 | 44.54286 | YES | YES |
| 148 | a | 649.92 | 30.40508 | YES | YES |
| 149 | a | 650.20 | 14.72473 | YES | YES |
| 150 | a | 650.85 | 51.06933 | YES | YES |
| 151 | a | 800.91 | 8.73629  | YES | YES |
| 152 | a | 806.86 | 50.25045 | YES | YES |
| 153 | a | 809.31 | 16.43588 | YES | YES |
| 154 | a | 810.59 | 12.97339 | YES | YES |
| 155 | a | 812.77 | 4.66144  | YES | YES |
| 156 | a | 813.17 | 6.01541  | YES | YES |
| 157 | a | 813.28 | 4.79342  | YES | YES |
| 158 | a | 813.83 | 17.81005 | YES | YES |
| 159 | a | 814.34 | 29.47959 | YES | YES |
| 160 | a | 814.95 | 20.50523 | YES | YES |
| 161 | a | 815.22 | 9.45116  | YES | YES |
| 162 | a | 817.00 | 37.64898 | YES | YES |
| 163 | a | 817.33 | 2.45973  | YES | YES |
| 164 | a | 818.25 | 9.77260  | YES | YES |
| 165 | a | 818.66 | 47.09910 | YES | YES |
| 166 | a | 819.84 | 58.03854 | YES | YES |
| 167 | a | 820.19 | 5.04176  | YES | YES |
| 168 | a | 820.71 | 6.70985  | YES | YES |
| 169 | a | 826.63 | 2.37576  | YES | YES |
| 170 | a | 828.16 | 11.94252 | YES | YES |
| 171 | a | 829.07 | 7.00977  | YES | YES |
| 172 | a | 830.05 | 9.32341  | YES | YES |
| 173 | a | 831.28 | 11.85541 | YES | YES |
| 174 | a | 832.10 | 3.49273  | YES | YES |
| 175 | a | 832.93 | 5.13775  | YES | YES |
| 176 | a | 833.34 | 10.19344 | YES | YES |
| 177 | a | 840.33 | 5.23372  | YES | YES |
| 178 | a | 842.90 | 5.16553  | YES | YES |
| 179 | a | 849.22 | 4.31643  | YES | YES |
| 180 | a | 851.92 | 3.63287  | YES | YES |
| 181 | a | 888.68 | 1.80309  | YES | YES |
| 182 | a | 890.56 | 0.85697  | YES | YES |
| 183 | a | 894.54 | 0.04555  | YES | YES |
| 184 | a | 895.34 | 0.10263  | YES | YES |
| 185 | a | 896.83 | 0.78649  | YES | YES |
| 186 | a | 897.43 | 0.26021  | YES | YES |
| 187 | a | 899.92 | 1.95962  | YES | YES |
| 188 | a | 903.70 | 2.47681  | YES | YES |
| 189 | a | 908.95 | 0.74710  | YES | YES |

|     |   |         |          |     |     |
|-----|---|---------|----------|-----|-----|
| 190 | a | 912.16  | 0.76618  | YES | YES |
| 191 | a | 913.72  | 1.24295  | YES | YES |
| 192 | a | 916.12  | 2.01037  | YES | YES |
| 193 | a | 987.51  | 10.22386 | YES | YES |
| 194 | a | 988.37  | 5.69962  | YES | YES |
| 195 | a | 989.03  | 1.52998  | YES | YES |
| 196 | a | 990.27  | 5.77526  | YES | YES |
| 197 | a | 993.90  | 4.49296  | YES | YES |
| 198 | a | 994.05  | 4.29555  | YES | YES |
| 199 | a | 1003.04 | 5.68347  | YES | YES |
| 200 | a | 1006.08 | 5.92570  | YES | YES |
| 201 | a | 1006.32 | 1.26763  | YES | YES |
| 202 | a | 1008.51 | 4.02701  | YES | YES |
| 203 | a | 1009.39 | 4.20170  | YES | YES |
| 204 | a | 1009.89 | 7.16693  | YES | YES |
| 205 | a | 1039.83 | 0.61134  | YES | YES |
| 206 | a | 1042.64 | 1.66869  | YES | YES |
| 207 | a | 1044.40 | 2.37344  | YES | YES |
| 208 | a | 1044.57 | 0.83513  | YES | YES |
| 209 | a | 1044.67 | 0.99442  | YES | YES |
| 210 | a | 1044.85 | 0.53476  | YES | YES |
| 211 | a | 1045.00 | 0.66524  | YES | YES |
| 212 | a | 1046.81 | 1.83140  | YES | YES |
| 213 | a | 1051.60 | 1.97181  | YES | YES |
| 214 | a | 1053.03 | 0.04167  | YES | YES |
| 215 | a | 1055.15 | 1.90718  | YES | YES |
| 216 | a | 1056.51 | 2.00334  | YES | YES |
| 217 | a | 1115.28 | 1.88119  | YES | YES |
| 218 | a | 1115.45 | 2.02946  | YES | YES |
| 219 | a | 1116.21 | 0.32806  | YES | YES |
| 220 | a | 1116.84 | 4.80329  | YES | YES |
| 221 | a | 1117.95 | 2.97214  | YES | YES |
| 222 | a | 1118.05 | 2.26109  | YES | YES |
| 223 | a | 1244.42 | 0.19642  | YES | YES |
| 224 | a | 1244.74 | 0.09386  | YES | YES |
| 225 | a | 1246.72 | 0.46723  | YES | YES |
| 226 | a | 1247.32 | 0.20543  | YES | YES |
| 227 | a | 1250.51 | 0.05106  | YES | YES |
| 228 | a | 1251.45 | 0.05217  | YES | YES |
| 229 | a | 1371.33 | 3.39432  | YES | YES |
| 230 | a | 1372.24 | 3.13818  | YES | YES |
| 231 | a | 1373.24 | 3.00714  | YES | YES |
| 232 | a | 1373.31 | 0.32680  | YES | YES |
| 233 | a | 1376.31 | 0.39825  | YES | YES |
| 234 | a | 1376.73 | 3.60806  | YES | YES |
| 235 | a | 1376.84 | 4.14754  | YES | YES |
| 236 | a | 1377.16 | 1.13130  | YES | YES |
| 237 | a | 1377.40 | 0.46085  | YES | YES |
| 238 | a | 1377.63 | 0.14912  | YES | YES |
| 239 | a | 1378.32 | 0.62564  | YES | YES |
| 240 | a | 1378.53 | 0.42658  | YES | YES |
| 241 | a | 1414.11 | 2.26639  | YES | YES |
| 242 | a | 1414.67 | 5.67470  | YES | YES |
| 243 | a | 1414.88 | 2.66604  | YES | YES |
| 244 | a | 1415.32 | 3.02066  | YES | YES |
| 245 | a | 1419.96 | 1.68474  | YES | YES |

|     |   |         |           |     |     |
|-----|---|---------|-----------|-----|-----|
| 246 | a | 1420.14 | 1.67746   | YES | YES |
| 247 | a | 1432.56 | 6.50289   | YES | YES |
| 248 | a | 1433.45 | 9.25002   | YES | YES |
| 249 | a | 1433.86 | 5.38406   | YES | YES |
| 250 | a | 1433.98 | 8.92813   | YES | YES |
| 251 | a | 1434.79 | 10.43103  | YES | YES |
| 252 | a | 1435.54 | 4.11334   | YES | YES |
| 253 | a | 1955.46 | 63.98136  | YES | YES |
| 254 | a | 1958.51 | 492.29360 | YES | YES |
| 255 | a | 1971.51 | 374.65909 | YES | YES |
| 256 | a | 1974.72 | 96.37346  | YES | YES |
| 257 | a | 1982.10 | 15.75845  | YES | YES |
| 258 | a | 1992.94 | 950.98068 | YES | YES |
| 259 | a | 2003.66 | 240.44450 | YES | YES |
| 260 | a | 2008.73 | 470.18545 | YES | YES |
| 261 | a | 2012.34 | 397.02096 | YES | YES |
| 262 | a | 2017.84 | 4.95426   | YES | YES |
| 263 | a | 2021.60 | 773.61043 | YES | YES |
| 264 | a | 2039.47 | 877.73876 | YES | YES |
| 265 | a | 3152.72 | 0.20722   | YES | YES |
| 266 | a | 3153.00 | 0.21525   | YES | YES |
| 267 | a | 3154.54 | 0.22973   | YES | YES |
| 268 | a | 3155.00 | 0.21997   | YES | YES |
| 269 | a | 3155.77 | 0.34392   | YES | YES |
| 270 | a | 3155.88 | 0.20670   | YES | YES |
| 271 | a | 3158.28 | 1.16319   | YES | YES |
| 272 | a | 3158.36 | 1.49419   | YES | YES |
| 273 | a | 3161.18 | 1.58273   | YES | YES |
| 274 | a | 3161.33 | 1.54906   | YES | YES |
| 275 | a | 3165.26 | 0.35617   | YES | YES |
| 276 | a | 3165.82 | 0.14926   | YES | YES |
| 277 | a | 3168.01 | 1.71469   | YES | YES |
| 278 | a | 3168.17 | 1.46231   | YES | YES |
| 279 | a | 3169.24 | 1.51383   | YES | YES |
| 280 | a | 3169.76 | 1.50102   | YES | YES |
| 281 | a | 3172.51 | 3.81509   | YES | YES |
| 282 | a | 3172.72 | 3.50388   | YES | YES |
| 283 | a | 3173.19 | 0.25995   | YES | YES |
| 284 | a | 3173.24 | 1.32015   | YES | YES |
| 285 | a | 3173.46 | 0.23660   | YES | YES |
| 286 | a | 3174.09 | 0.78278   | YES | YES |
| 287 | a | 3176.44 | 0.27833   | YES | YES |
| 288 | a | 3176.73 | 2.99426   | YES | YES |
| 289 | a | 3180.54 | 1.21781   | YES | YES |
| 290 | a | 3180.75 | 1.21840   | YES | YES |
| 291 | a | 3185.35 | 0.33941   | YES | YES |
| 292 | a | 3186.72 | 0.47419   | YES | YES |
| 293 | a | 3198.56 | 0.50082   | YES | YES |
| 294 | a | 3198.66 | 0.55370   | YES | YES |

#### 4.9 [(CO)<sub>3</sub>Cp<sub>2</sub>Fe<sub>2</sub>]-μ-GeCl[FeCp(CO)<sub>2</sub>] 2

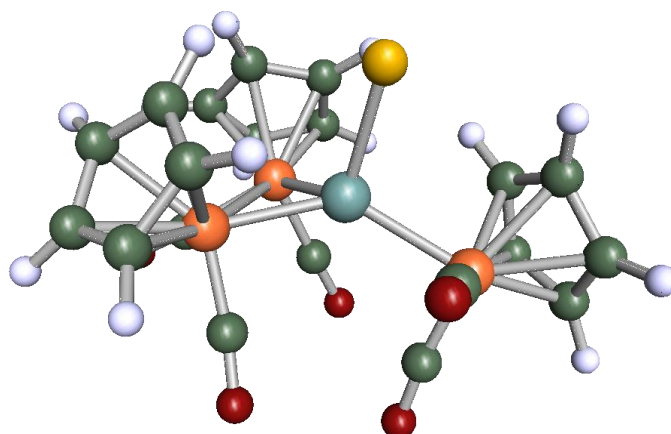

Figure S24: Optimized calculated structure of  $[(\text{CO})_3\text{Cp}_2\text{Fe}_2]-\mu\text{-GeCl}[\text{FeCp}(\text{CO})_2] \mathbf{2}$

Total energy: -7475.43530080433 H

symmetry used:  $\text{C}_1$

HOMO-LUMO gap: 2.096 eV

lowest vibrational eigenvalue:  $18.48 \text{ cm}^{-1}$

#### Atomic coordinates:

|              |           |           |             |           |           |
|--------------|-----------|-----------|-------------|-----------|-----------|
| Ge -0.535876 | 0.232448  | 0.231367  | C -0.868377 | -2.613993 | -2.625475 |
| Fe -0.737701 | 1.100108  | 2.411010  | H -0.162970 | -2.602682 | -3.466654 |
| Fe -0.401960 | -1.921248 | -0.666664 | C -1.772159 | -1.556750 | -2.272898 |
| Fe 1.407596  | -0.047035 | -1.043724 | H -1.899788 | -0.599918 | -2.790392 |
| Cl -2.160093 | 1.470941  | -0.896556 | C -2.490247 | -1.947292 | -1.094817 |
| C 0.772762   | 2.568318  | 2.622340  | H -3.258071 | -1.356138 | -0.581149 |
| H 1.847725   | 2.356651  | 2.558319  | C 0.785094  | 0.684632  | -2.964111 |
| C -1.418590  | 3.066791  | 2.042380  | H -0.163330 | 0.461946  | -3.465014 |
| H -2.307620  | 3.297836  | 1.443113  | C 1.020150  | 1.783292  | -2.072933 |
| C -1.381302  | 2.821192  | 3.463150  | H 0.283210  | 2.549797  | -1.805412 |
| H -2.243082  | 2.844847  | 4.143001  | C 2.381844  | 1.700109  | -1.633940 |
| C -0.034707  | 2.513055  | 3.821804  | H 2.880104  | 2.389392  | -0.938739 |
| H 0.326871   | 2.260192  | 4.827158  | C 2.997539  | 0.556642  | -2.275254 |
| C -0.085015  | 2.920504  | 1.531927  | H 4.033153  | 0.218712  | -2.140504 |
| H 0.227647   | 3.071469  | 0.491821  | C 2.004695  | -0.061055 | -3.094347 |
| C 0.191997   | -0.179749 | 3.156561  | H 2.142244  | -0.970574 | -3.692525 |
| C -2.251146  | 0.230564  | 2.428150  | C 2.267872  | -0.097968 | 0.457421  |
| C 0.033075   | -2.562575 | 0.883000  | O 0.825868  | -0.950447 | 3.758895  |
| C 1.440824   | -1.953781 | -1.171262 | O -3.266741 | -0.347280 | 2.452809  |
| C -2.015241  | -3.247069 | -0.715440 | O 0.273794  | -3.109198 | 1.890823  |
| H -2.358341  | -3.828444 | 0.151448  | O 2.232755  | -2.791794 | -1.489229 |
| C -1.016363  | -3.667753 | -1.669077 | O 2.904018  | -0.077936 | 1.443423  |
| H -0.452094  | -4.608702 | -1.643841 |             |           |           |

#### Vibrational analysis:

| #  |   | cm** (-1) | km/mol    | IR  | RAMAN |
|----|---|-----------|-----------|-----|-------|
| 1  |   | -0.00     | 0.00000   | -   | -     |
| 2  |   | -0.00     | 0.00000   | -   | -     |
| 3  |   | -0.00     | 0.00000   | -   | -     |
| 4  |   | -0.00     | 0.00000   | -   | -     |
| 5  |   | 0.00      | 0.00000   | -   | -     |
| 6  |   | 0.00      | 0.00000   | -   | -     |
| 7  | a | 18.48     | 1.57975   | YES | YES   |
| 8  | a | 23.00     | 0.27486   | YES | YES   |
| 9  | a | 42.48     | 0.56508   | YES | YES   |
| 10 | a | 46.74     | 0.40215   | YES | YES   |
| 11 | a | 51.42     | 0.48548   | YES | YES   |
| 12 | a | 60.53     | 0.20503   | YES | YES   |
| 13 | a | 66.83     | 0.43994   | YES | YES   |
| 14 | a | 76.08     | 0.30279   | YES | YES   |
| 15 | a | 85.39     | 1.19679   | YES | YES   |
| 16 | a | 94.73     | 0.15815   | YES | YES   |
| 17 | a | 96.96     | 1.04428   | YES | YES   |
| 18 | a | 99.89     | 1.01290   | YES | YES   |
| 19 | a | 108.77    | 0.41930   | YES | YES   |
| 20 | a | 118.12    | 0.78155   | YES | YES   |
| 21 | a | 127.42    | 2.55776   | YES | YES   |
| 22 | a | 135.72    | 2.05379   | YES | YES   |
| 23 | a | 145.33    | 1.39194   | YES | YES   |
| 24 | a | 147.60    | 0.65298   | YES | YES   |
| 25 | a | 154.15    | 0.93156   | YES | YES   |
| 26 | a | 156.46    | 3.56730   | YES | YES   |
| 27 | a | 166.00    | 6.76651   | YES | YES   |
| 28 | a | 173.05    | 6.02736   | YES | YES   |
| 29 | a | 194.11    | 2.11145   | YES | YES   |
| 30 | a | 203.23    | 8.71441   | YES | YES   |
| 31 | a | 222.15    | 11.54771  | YES | YES   |
| 32 | a | 272.21    | 15.35573  | YES | YES   |
| 33 | a | 276.73    | 56.65776  | YES | YES   |
| 34 | a | 296.27    | 79.77673  | YES | YES   |
| 35 | a | 353.01    | 17.18688  | YES | YES   |
| 36 | a | 353.74    | 3.16328   | YES | YES   |
| 37 | a | 360.47    | 5.29871   | YES | YES   |
| 38 | a | 362.50    | 14.45824  | YES | YES   |
| 39 | a | 377.88    | 17.62741  | YES | YES   |
| 40 | a | 381.80    | 3.05660   | YES | YES   |
| 41 | a | 387.03    | 8.58571   | YES | YES   |
| 42 | a | 398.43    | 0.47192   | YES | YES   |
| 43 | a | 427.11    | 1.52808   | YES | YES   |
| 44 | a | 454.71    | 3.56465   | YES | YES   |
| 45 | a | 459.97    | 0.30801   | YES | YES   |
| 46 | a | 501.24    | 33.83446  | YES | YES   |
| 47 | a | 505.53    | 82.73190  | YES | YES   |
| 48 | a | 508.32    | 114.26483 | YES | YES   |
| 49 | a | 519.10    | 28.02463  | YES | YES   |
| 50 | a | 549.75    | 176.75641 | YES | YES   |
| 51 | a | 563.48    | 109.39313 | YES | YES   |
| 52 | a | 573.15    | 19.47618  | YES | YES   |
| 53 | a | 574.34    | 21.23569  | YES | YES   |
| 54 | a | 575.62    | 16.78275  | YES | YES   |
| 55 | a | 578.74    | 0.83856   | YES | YES   |

|     |   |         |           |     |     |
|-----|---|---------|-----------|-----|-----|
| 56  | a | 581.15  | 124.74371 | YES | YES |
| 57  | a | 583.62  | 10.62646  | YES | YES |
| 58  | a | 586.41  | 25.92286  | YES | YES |
| 59  | a | 591.17  | 51.74420  | YES | YES |
| 60  | a | 599.85  | 61.94394  | YES | YES |
| 61  | a | 600.88  | 9.53547   | YES | YES |
| 62  | a | 624.46  | 73.14595  | YES | YES |
| 63  | a | 633.59  | 398.25174 | YES | YES |
| 64  | a | 646.60  | 134.44105 | YES | YES |
| 65  | a | 774.44  | 31.88737  | YES | YES |
| 66  | a | 806.68  | 1.25446   | YES | YES |
| 67  | a | 808.59  | 23.22923  | YES | YES |
| 68  | a | 811.14  | 16.64464  | YES | YES |
| 69  | a | 811.64  | 13.89316  | YES | YES |
| 70  | a | 813.60  | 33.54561  | YES | YES |
| 71  | a | 814.21  | 1.34343   | YES | YES |
| 72  | a | 816.10  | 22.86402  | YES | YES |
| 73  | a | 818.61  | 54.23983  | YES | YES |
| 74  | a | 825.89  | 43.82567  | YES | YES |
| 75  | a | 833.43  | 49.94715  | YES | YES |
| 76  | a | 837.97  | 5.71344   | YES | YES |
| 77  | a | 843.68  | 29.36876  | YES | YES |
| 78  | a | 851.78  | 24.33711  | YES | YES |
| 79  | a | 861.04  | 9.30473   | YES | YES |
| 80  | a | 898.92  | 0.45825   | YES | YES |
| 81  | a | 902.57  | 3.58247   | YES | YES |
| 82  | a | 909.89  | 0.61520   | YES | YES |
| 83  | a | 911.70  | 0.39735   | YES | YES |
| 84  | a | 916.39  | 10.74360  | YES | YES |
| 85  | a | 927.22  | 5.70572   | YES | YES |
| 86  | a | 979.57  | 14.20477  | YES | YES |
| 87  | a | 984.00  | 13.93232  | YES | YES |
| 88  | a | 985.71  | 10.06169  | YES | YES |
| 89  | a | 992.92  | 8.72968   | YES | YES |
| 90  | a | 996.69  | 17.76353  | YES | YES |
| 91  | a | 998.33  | 16.24107  | YES | YES |
| 92  | a | 1028.04 | 1.61388   | YES | YES |
| 93  | a | 1028.99 | 1.14759   | YES | YES |
| 94  | a | 1030.46 | 0.83509   | YES | YES |
| 95  | a | 1030.84 | 1.11124   | YES | YES |
| 96  | a | 1033.48 | 0.08432   | YES | YES |
| 97  | a | 1038.69 | 0.48578   | YES | YES |
| 98  | a | 1114.55 | 2.54237   | YES | YES |
| 99  | a | 1116.60 | 5.27873   | YES | YES |
| 100 | a | 1118.50 | 6.40350   | YES | YES |
| 101 | a | 1232.55 | 0.30771   | YES | YES |
| 102 | a | 1234.14 | 0.30555   | YES | YES |
| 103 | a | 1235.35 | 0.11133   | YES | YES |
| 104 | a | 1369.72 | 4.82083   | YES | YES |
| 105 | a | 1370.54 | 2.35010   | YES | YES |
| 106 | a | 1372.80 | 0.93181   | YES | YES |
| 107 | a | 1373.07 | 0.69682   | YES | YES |
| 108 | a | 1375.72 | 3.81581   | YES | YES |
| 109 | a | 1377.40 | 2.57399   | YES | YES |
| 110 | a | 1408.62 | 8.47793   | YES | YES |
| 111 | a | 1411.95 | 12.99755  | YES | YES |



|     |   |         |            |     |     |
|-----|---|---------|------------|-----|-----|
| 112 | a | 1413.98 | 4.99768    | YES | YES |
| 113 | a | 1423.48 | 7.23577    | YES | YES |
| 114 | a | 1425.94 | 12.26250   | YES | YES |
| 115 | a | 1426.47 | 7.38999    | YES | YES |
| 116 | a | 1798.52 | 1020.54744 | YES | YES |
| 117 | a | 1947.72 | 451.40274  | YES | YES |
| 118 | a | 1962.04 | 472.74322  | YES | YES |
| 119 | a | 1973.58 | 1738.74434 | YES | YES |
| 120 | a | 2020.92 | 1595.31599 | YES | YES |
| 121 | a | 3157.73 | 1.10085    | YES | YES |
| 122 | a | 3158.37 | 0.49173    | YES | YES |
| 123 | a | 3164.45 | 0.53699    | YES | YES |
| 124 | a | 3164.75 | 0.04664    | YES | YES |
| 125 | a | 3168.11 | 0.06075    | YES | YES |
| 126 | a | 3171.03 | 0.22824    | YES | YES |
| 127 | a | 3178.44 | 0.68405    | YES | YES |
| 128 | a | 3178.85 | 1.20598    | YES | YES |
| 129 | a | 3179.19 | 0.70138    | YES | YES |
| 130 | a | 3179.75 | 1.61803    | YES | YES |
| 131 | a | 3181.02 | 0.49194    | YES | YES |
| 132 | a | 3182.79 | 1.45356    | YES | YES |
| 133 | a | 3191.48 | 0.64861    | YES | YES |
| 134 | a | 3194.82 | 0.32087    | YES | YES |
| 135 | a | 3198.37 | 1.20953    | YES | YES |

#### 4.10 Ge<sub>6</sub>[FeCp(CO)<sub>2</sub>]<sub>6</sub>Cl<sub>2</sub> 3

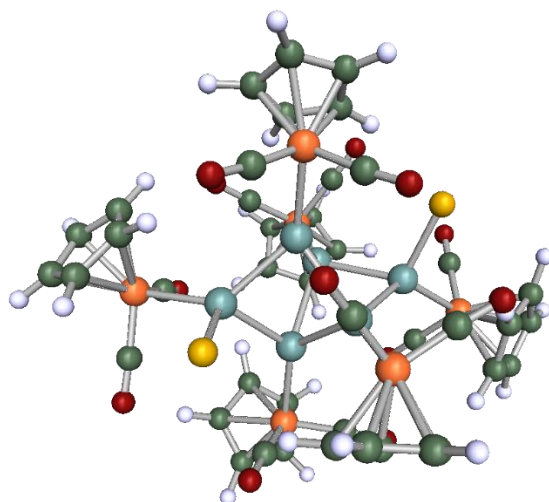

Figure S25: Optimized calculated structure of Ge<sub>6</sub>[FeCp(CO)<sub>2</sub>]<sub>6</sub>Cl<sub>2</sub> 3

Total energy: -22565.12752535429 H

symmetry used: C<sub>1</sub>

HOMO-LUMO gap: 1.566 eV

lowest vibrational eigenvalue: 7.23 cm<sup>-1</sup>

### Atomic coordinates:

|    |           |           |           |   |           |           |           |
|----|-----------|-----------|-----------|---|-----------|-----------|-----------|
| Ge | 0.463723  | -1.676092 | -0.879979 | H | -3.373577 | -4.005530 | -0.771704 |
| Ge | 1.779301  | 0.547402  | -0.583183 | C | 3.700483  | -1.538572 | 2.473788  |
| Ge | -1.779280 | -0.547340 | -         | C | 2.285525  | -0.125842 | 4.039458  |
|    | 0.583061  |           |           | C | 2.809565  | -3.422730 | 4.544234  |
| Ge | 0.994748  | -0.783741 | 1.507290  | H | 3.837212  | -3.624690 | 4.873904  |
| Fe | 1.013285  | -3.770493 | -1.999107 | C | 1.827841  | -2.668177 | 5.251575  |
| Ge | -0.463728 | 1.676177  | -0.880018 | H | 1.966759  | -2.182049 | 6.226875  |
| Fe | 3.983597  | 1.220981  | -1.376791 | C | 0.617292  | -2.646472 | 4.463626  |
| Ge | -0.994593 | 0.783891  | 1.507285  | H | -0.328339 | -2.157173 | 4.732472  |
| Fe | -3.983522 | -1.221014 | -         | C | 0.859853  | -3.400262 | 3.269830  |
|    | 1.376831  |           |           | H | 0.136335  | -3.589715 | 2.466020  |
| Fe | 2.225206  | -1.736046 | 3.384688  | C | 2.213243  | -3.866293 | 3.305664  |
| C  | -0.314480 | -4.476399 | -1.125347 | H | 2.708937  | -4.453772 | 2.522053  |
| C  | 2.169820  | -4.092956 | -0.732108 | O | -1.197243 | -5.011656 | -0.569731 |
| C  | 1.390715  | -2.595932 | -3.765704 | O | 2.958161  | -4.384704 | 0.081383  |
| H  | 1.471841  | -1.501854 | -3.809490 | C | 0.314543  | 4.476453  | -1.125470 |
| C  | 0.190941  | -3.360772 | -3.930919 | C | -2.169685 | 4.093101  | -0.731982 |
| H  | -0.810481 | -2.953281 | -4.122218 | C | -1.390952 | 2.595911  | -3.765597 |
| C  | 0.541817  | -4.757738 | -3.819703 | H | -1.472190 | 1.501830  | -3.809410 |
| H  | -0.156365 | -5.602024 | -3.900909 | C | -0.191126 | 3.360632  | -3.930978 |
| C  | 1.944836  | -4.851558 | -3.580071 | H | 0.810239  | 2.953035  | -4.122401 |
| H  | 2.522180  | -5.776117 | -3.447651 | C | -0.541920 | 4.757642  | -3.819868 |
| C  | 2.470215  | -3.507538 | -3.532406 | H | 0.156327  | 5.601871  | -3.901203 |
| H  | 3.514866  | -3.226799 | -3.345838 | C | -1.944892 | 4.851585  | -3.580069 |
| Fe | -1.013308 | 3.770562  | -1.999129 | H | -2.522161 | 5.776201  | -3.447729 |
| C  | 3.235183  | 1.461805  | -2.927646 | C | -2.470374 | 3.507620  | -3.532326 |
| C  | 4.337178  | -0.459315 | -1.687453 | H | -3.515040 | 3.226968  | -3.345762 |
| C  | 5.245237  | 2.927116  | -1.490224 | O | 2.786349  | 1.637488  | -3.996763 |
| H  | 5.491527  | 3.454464  | -2.421997 | O | 4.646505  | -1.560845 | -1.930402 |
| C  | 5.969972  | 1.835946  | -0.927925 | C | -3.700424 | 1.538367  | 2.473871  |
| H  | 6.873551  | 1.371771  | -1.344776 | C | -2.285245 | 0.125804  | 4.039440  |
| C  | 5.297248  | 1.439389  | 0.288075  | C | -2.809619 | 3.422611  | 4.544339  |
| H  | 5.591937  | 0.614430  | 0.949263  | H | -3.837290 | 3.624403  | 4.874073  |
| C  | 4.172501  | 2.304713  | 0.476917  | C | -1.827758 | 2.668193  | 5.251642  |
| H  | 3.471488  | 2.272249  | 1.321346  | H | -1.966546 | 2.182027  | 6.226946  |
| C  | 4.123784  | 3.217495  | -0.626233 | C | -0.617233 | 2.646678  | 4.463606  |
| H  | 3.373634  | 4.005508  | -0.771703 | H | 0.328493  | 2.157491  | 4.732375  |
| Fe | -2.225114 | 1.736065  | 3.384720  | C | -0.859985 | 3.400478  | 3.269813  |
| C  | -3.234991 | -1.461743 | -2.927627 | H | -0.136549 | 3.590048  | 2.465943  |
| C  | -4.337194 | 0.459258  | -1.687555 | C | -2.213436 | 3.866329  | 3.305751  |
| C  | -5.245110 | -2.927163 | -1.490408 | H | -2.709261 | 4.453739  | 2.522175  |
| H  | -5.491364 | -3.454533 | -2.422175 | O | -2.786042 | -1.637364 | -3.996678 |
| C  | -5.969918 | -1.836021 | -0.928163 | O | -4.646703 | 1.560696  | -1.930698 |
| H  | -6.873485 | -1.371896 | -1.345102 | O | 4.733130  | -1.432530 | 1.934442  |
| C  | -5.297320 | -1.439397 | 0.287886  | O | 2.361535  | 0.934322  | 4.534337  |
| H  | -5.592051 | -0.614375 | 0.948982  | O | 1.197377  | 5.011553  | -0.569837 |
| C  | -4.172591 | -2.304771 | 0.476854  | O | -2.957840 | 4.384975  | 0.081609  |
| H  | -3.471631 | -2.272258 | 1.321332  | O | -4.733093 | 1.432178  | 1.934635  |
| C  | -4.123740 | -3.217508 | -0.626310 | O | -2.361249 | -0.934403 | 4.534232  |

### Vibrational analysis:

| #  |   | cm** (-1) | km/mol  | IR  | RAMAN |
|----|---|-----------|---------|-----|-------|
| 1  |   | -0.00     | 0.00000 | -   | -     |
| 2  |   | -0.00     | 0.00000 | -   | -     |
| 3  |   | 0.00      | 0.00000 | -   | -     |
| 4  |   | 0.00      | 0.00000 | -   | -     |
| 5  |   | 0.00      | 0.00000 | -   | -     |
| 6  |   | 0.00      | 0.00000 | -   | -     |
| 7  | a | 7.23      | 0.11995 | YES | YES   |
| 8  | a | 7.29      | 0.18292 | YES | YES   |
| 9  | a | 12.49     | 0.21029 | YES | YES   |
| 10 | a | 17.43     | 0.14629 | YES | YES   |
| 11 | a | 19.96     | 0.19670 | YES | YES   |
| 12 | a | 20.16     | 0.65265 | YES | YES   |
| 13 | a | 22.67     | 0.01679 | YES | YES   |
| 14 | a | 22.85     | 0.19703 | YES | YES   |
| 15 | a | 26.43     | 0.04709 | YES | YES   |
| 16 | a | 29.03     | 0.11055 | YES | YES   |
| 17 | a | 30.46     | 0.00041 | YES | YES   |
| 18 | a | 33.89     | 0.06287 | YES | YES   |
| 19 | a | 35.97     | 0.01798 | YES | YES   |
| 20 | a | 39.00     | 0.03468 | YES | YES   |
| 21 | a | 39.82     | 0.01298 | YES | YES   |
| 22 | a | 45.67     | 0.00113 | YES | YES   |
| 23 | a | 46.60     | 0.08028 | YES | YES   |
| 24 | a | 48.76     | 0.19510 | YES | YES   |
| 25 | a | 50.47     | 0.06290 | YES | YES   |
| 26 | a | 50.57     | 0.11861 | YES | YES   |
| 27 | a | 51.57     | 0.17765 | YES | YES   |
| 28 | a | 52.66     | 0.20082 | YES | YES   |
| 29 | a | 53.00     | 0.32641 | YES | YES   |
| 30 | a | 57.25     | 0.00143 | YES | YES   |
| 31 | a | 58.90     | 0.00128 | YES | YES   |
| 32 | a | 60.00     | 0.00001 | YES | YES   |
| 33 | a | 65.06     | 1.64216 | YES | YES   |
| 34 | a | 71.53     | 0.73811 | YES | YES   |
| 35 | a | 71.62     | 0.14244 | YES | YES   |
| 36 | a | 71.90     | 0.66540 | YES | YES   |
| 37 | a | 74.67     | 0.58925 | YES | YES   |
| 38 | a | 76.17     | 0.01167 | YES | YES   |
| 39 | a | 76.74     | 0.01406 | YES | YES   |
| 40 | a | 82.77     | 0.10207 | YES | YES   |
| 41 | a | 83.09     | 0.09609 | YES | YES   |
| 42 | a | 87.52     | 0.00178 | YES | YES   |
| 43 | a | 97.45     | 0.28850 | YES | YES   |
| 44 | a | 97.71     | 0.32192 | YES | YES   |
| 45 | a | 101.47    | 3.17539 | YES | YES   |
| 46 | a | 103.73    | 0.09031 | YES | YES   |
| 47 | a | 103.82    | 0.10898 | YES | YES   |
| 48 | a | 104.84    | 0.04053 | YES | YES   |
| 49 | a | 112.65    | 0.29825 | YES | YES   |
| 50 | a | 116.97    | 0.09778 | YES | YES   |
| 51 | a | 117.43    | 0.18513 | YES | YES   |
| 52 | a | 119.09    | 0.19000 | YES | YES   |
| 53 | a | 119.24    | 0.09075 | YES | YES   |
| 54 | a | 120.08    | 0.15607 | YES | YES   |
| 55 | a | 121.79    | 0.00022 | YES | YES   |

|     |   |        |           |     |     |
|-----|---|--------|-----------|-----|-----|
| 56  | a | 130.45 | 0.00204   | YES | YES |
| 57  | a | 131.75 | 0.04788   | YES | YES |
| 58  | a | 134.53 | 0.03008   | YES | YES |
| 59  | a | 136.43 | 0.04436   | YES | YES |
| 60  | a | 138.05 | 0.00086   | YES | YES |
| 61  | a | 138.81 | 0.01421   | YES | YES |
| 62  | a | 145.63 | 0.18309   | YES | YES |
| 63  | a | 145.81 | 0.41134   | YES | YES |
| 64  | a | 159.24 | 0.64368   | YES | YES |
| 65  | a | 161.41 | 3.76757   | YES | YES |
| 66  | a | 162.25 | 4.83383   | YES | YES |
| 67  | a | 166.71 | 4.68496   | YES | YES |
| 68  | a | 167.14 | 6.34909   | YES | YES |
| 69  | a | 175.05 | 21.60778  | YES | YES |
| 70  | a | 184.84 | 8.53908   | YES | YES |
| 71  | a | 185.23 | 9.36476   | YES | YES |
| 72  | a | 218.51 | 0.07366   | YES | YES |
| 73  | a | 219.38 | 0.05732   | YES | YES |
| 74  | a | 224.17 | 0.05499   | YES | YES |
| 75  | a | 255.77 | 32.60298  | YES | YES |
| 76  | a | 256.67 | 31.90380  | YES | YES |
| 77  | a | 267.96 | 44.39384  | YES | YES |
| 78  | a | 276.86 | 0.06617   | YES | YES |
| 79  | a | 333.61 | 4.15992   | YES | YES |
| 80  | a | 333.82 | 5.16748   | YES | YES |
| 81  | a | 335.12 | 4.13881   | YES | YES |
| 82  | a | 335.52 | 7.05955   | YES | YES |
| 83  | a | 335.76 | 0.00817   | YES | YES |
| 84  | a | 336.01 | 3.96389   | YES | YES |
| 85  | a | 350.39 | 2.19611   | YES | YES |
| 86  | a | 350.41 | 5.38883   | YES | YES |
| 87  | a | 352.43 | 4.45355   | YES | YES |
| 88  | a | 352.58 | 1.93993   | YES | YES |
| 89  | a | 353.89 | 1.34083   | YES | YES |
| 90  | a | 353.93 | 7.39743   | YES | YES |
| 91  | a | 363.79 | 9.44902   | YES | YES |
| 92  | a | 363.92 | 0.01795   | YES | YES |
| 93  | a | 364.32 | 8.46635   | YES | YES |
| 94  | a | 365.03 | 3.42160   | YES | YES |
| 95  | a | 366.15 | 7.93098   | YES | YES |
| 96  | a | 366.32 | 0.94011   | YES | YES |
| 97  | a | 446.24 | 0.09213   | YES | YES |
| 98  | a | 446.50 | 0.17509   | YES | YES |
| 99  | a | 447.07 | 0.20491   | YES | YES |
| 100 | a | 447.57 | 0.27800   | YES | YES |
| 101 | a | 450.17 | 0.28067   | YES | YES |
| 102 | a | 450.27 | 0.06430   | YES | YES |
| 103 | a | 495.23 | 0.86545   | YES | YES |
| 104 | a | 495.31 | 5.31856   | YES | YES |
| 105 | a | 495.53 | 8.07357   | YES | YES |
| 106 | a | 495.68 | 7.31043   | YES | YES |
| 107 | a | 495.75 | 2.85287   | YES | YES |
| 108 | a | 495.93 | 0.67971   | YES | YES |
| 109 | a | 525.21 | 1.51429   | YES | YES |
| 110 | a | 525.49 | 0.39434   | YES | YES |
| 111 | a | 525.74 | 101.52304 | YES | YES |

|     |   |        |           |     |     |
|-----|---|--------|-----------|-----|-----|
| 112 | a | 525.95 | 87.78452  | YES | YES |
| 113 | a | 526.33 | 90.55552  | YES | YES |
| 114 | a | 529.37 | 0.08973   | YES | YES |
| 115 | a | 566.13 | 75.59121  | YES | YES |
| 116 | a | 566.38 | 63.88117  | YES | YES |
| 117 | a | 566.79 | 11.71029  | YES | YES |
| 118 | a | 566.85 | 7.95859   | YES | YES |
| 119 | a | 567.50 | 62.82242  | YES | YES |
| 120 | a | 567.94 | 2.61679   | YES | YES |
| 121 | a | 574.92 | 33.86978  | YES | YES |
| 122 | a | 576.15 | 28.63052  | YES | YES |
| 123 | a | 576.48 | 120.91855 | YES | YES |
| 124 | a | 576.59 | 34.17394  | YES | YES |
| 125 | a | 577.71 | 22.15962  | YES | YES |
| 126 | a | 577.76 | 77.51434  | YES | YES |
| 127 | a | 579.17 | 64.09985  | YES | YES |
| 128 | a | 579.63 | 85.33611  | YES | YES |
| 129 | a | 579.90 | 76.80751  | YES | YES |
| 130 | a | 579.90 | 56.17899  | YES | YES |
| 131 | a | 580.64 | 95.59193  | YES | YES |
| 132 | a | 586.10 | 0.09476   | YES | YES |
| 133 | a | 593.80 | 2.47961   | YES | YES |
| 134 | a | 594.39 | 0.09783   | YES | YES |
| 135 | a | 596.00 | 16.56775  | YES | YES |
| 136 | a | 596.57 | 21.27592  | YES | YES |
| 137 | a | 597.61 | 66.01788  | YES | YES |
| 138 | a | 599.25 | 0.83470   | YES | YES |
| 139 | a | 649.51 | 7.67307   | YES | YES |
| 140 | a | 649.55 | 6.79060   | YES | YES |
| 141 | a | 650.41 | 43.94874  | YES | YES |
| 142 | a | 650.46 | 11.22200  | YES | YES |
| 143 | a | 651.44 | 53.71789  | YES | YES |
| 144 | a | 651.53 | 26.33595  | YES | YES |
| 145 | a | 809.88 | 6.54160   | YES | YES |
| 146 | a | 810.56 | 12.33783  | YES | YES |
| 147 | a | 811.04 | 38.21902  | YES | YES |
| 148 | a | 811.09 | 1.55265   | YES | YES |
| 149 | a | 812.28 | 22.40705  | YES | YES |
| 150 | a | 812.35 | 6.80488   | YES | YES |
| 151 | a | 812.98 | 22.66539  | YES | YES |
| 152 | a | 813.19 | 2.95677   | YES | YES |
| 153 | a | 813.52 | 7.10099   | YES | YES |
| 154 | a | 813.68 | 31.53338  | YES | YES |
| 155 | a | 814.41 | 0.04849   | YES | YES |
| 156 | a | 814.57 | 0.87214   | YES | YES |
| 157 | a | 816.80 | 32.60376  | YES | YES |
| 158 | a | 817.18 | 50.86666  | YES | YES |
| 159 | a | 817.22 | 5.22579   | YES | YES |
| 160 | a | 817.61 | 56.85240  | YES | YES |
| 161 | a | 817.87 | 96.86906  | YES | YES |
| 162 | a | 818.04 | 0.55114   | YES | YES |
| 163 | a | 823.55 | 19.74432  | YES | YES |
| 164 | a | 823.67 | 3.14894   | YES | YES |
| 165 | a | 826.10 | 1.89962   | YES | YES |
| 166 | a | 826.79 | 25.04398  | YES | YES |
| 167 | a | 830.96 | 26.80941  | YES | YES |

|     |   |         |          |     |     |
|-----|---|---------|----------|-----|-----|
| 168 | a | 831.01  | 12.29905 | YES | YES |
| 169 | a | 847.80  | 5.21529  | YES | YES |
| 170 | a | 847.81  | 1.24366  | YES | YES |
| 171 | a | 852.18  | 4.67737  | YES | YES |
| 172 | a | 852.25  | 3.90704  | YES | YES |
| 173 | a | 854.07  | 4.59265  | YES | YES |
| 174 | a | 854.49  | 2.78141  | YES | YES |
| 175 | a | 894.85  | 0.70469  | YES | YES |
| 176 | a | 894.94  | 0.24614  | YES | YES |
| 177 | a | 896.52  | 1.53573  | YES | YES |
| 178 | a | 896.58  | 0.46807  | YES | YES |
| 179 | a | 897.28  | 1.12731  | YES | YES |
| 180 | a | 897.32  | 1.14495  | YES | YES |
| 181 | a | 904.16  | 0.58192  | YES | YES |
| 182 | a | 904.61  | 0.47983  | YES | YES |
| 183 | a | 904.79  | 0.44404  | YES | YES |
| 184 | a | 905.09  | 0.83587  | YES | YES |
| 185 | a | 905.98  | 0.24792  | YES | YES |
| 186 | a | 906.24  | 0.90626  | YES | YES |
| 187 | a | 986.88  | 1.50102  | YES | YES |
| 188 | a | 986.90  | 8.69883  | YES | YES |
| 189 | a | 987.97  | 0.31075  | YES | YES |
| 190 | a | 988.09  | 9.00642  | YES | YES |
| 191 | a | 988.28  | 1.83957  | YES | YES |
| 192 | a | 988.51  | 0.13298  | YES | YES |
| 193 | a | 1008.60 | 13.45866 | YES | YES |
| 194 | a | 1008.62 | 4.29759  | YES | YES |
| 195 | a | 1009.45 | 1.48909  | YES | YES |
| 196 | a | 1009.49 | 16.53907 | YES | YES |
| 197 | a | 1009.75 | 8.08883  | YES | YES |
| 198 | a | 1009.82 | 10.64817 | YES | YES |
| 199 | a | 1043.75 | 3.87259  | YES | YES |
| 200 | a | 1043.79 | 0.95871  | YES | YES |
| 201 | a | 1045.18 | 1.14358  | YES | YES |
| 202 | a | 1045.31 | 1.71423  | YES | YES |
| 203 | a | 1045.56 | 3.80474  | YES | YES |
| 204 | a | 1046.33 | 1.25852  | YES | YES |
| 205 | a | 1047.63 | 0.20785  | YES | YES |
| 206 | a | 1047.70 | 2.57219  | YES | YES |
| 207 | a | 1048.33 | 0.12058  | YES | YES |
| 208 | a | 1049.23 | 1.20846  | YES | YES |
| 209 | a | 1049.75 | 1.77426  | YES | YES |
| 210 | a | 1050.23 | 1.35711  | YES | YES |
| 211 | a | 1116.27 | 2.61610  | YES | YES |
| 212 | a | 1116.28 | 0.22442  | YES | YES |
| 213 | a | 1116.60 | 1.38818  | YES | YES |
| 214 | a | 1116.64 | 2.30694  | YES | YES |
| 215 | a | 1116.70 | 0.27934  | YES | YES |
| 216 | a | 1116.72 | 3.36382  | YES | YES |
| 217 | a | 1247.48 | 0.09107  | YES | YES |
| 218 | a | 1247.49 | 0.13451  | YES | YES |
| 219 | a | 1248.73 | 0.15379  | YES | YES |
| 220 | a | 1248.74 | 0.13888  | YES | YES |
| 221 | a | 1248.77 | 0.07641  | YES | YES |
| 222 | a | 1248.79 | 0.02024  | YES | YES |
| 223 | a | 1370.49 | 2.69927  | YES | YES |

|     |   |         |            |     |     |
|-----|---|---------|------------|-----|-----|
| 224 | a | 1370.57 | 0.05247    | YES | YES |
| 225 | a | 1372.45 | 3.70409    | YES | YES |
| 226 | a | 1372.52 | 0.34043    | YES | YES |
| 227 | a | 1372.87 | 3.49454    | YES | YES |
| 228 | a | 1372.90 | 0.07554    | YES | YES |
| 229 | a | 1377.01 | 1.12631    | YES | YES |
| 230 | a | 1377.17 | 0.83807    | YES | YES |
| 231 | a | 1377.62 | 1.60610    | YES | YES |
| 232 | a | 1377.68 | 1.20028    | YES | YES |
| 233 | a | 1377.84 | 0.48045    | YES | YES |
| 234 | a | 1378.00 | 0.46424    | YES | YES |
| 235 | a | 1415.90 | 4.89351    | YES | YES |
| 236 | a | 1415.90 | 2.92013    | YES | YES |
| 237 | a | 1416.40 | 1.70958    | YES | YES |
| 238 | a | 1416.42 | 4.63321    | YES | YES |
| 239 | a | 1416.48 | 1.44248    | YES | YES |
| 240 | a | 1416.64 | 0.21055    | YES | YES |
| 241 | a | 1435.39 | 14.08538   | YES | YES |
| 242 | a | 1435.52 | 0.87638    | YES | YES |
| 243 | a | 1435.60 | 12.90401   | YES | YES |
| 244 | a | 1435.61 | 3.61205    | YES | YES |
| 245 | a | 1435.90 | 2.84984    | YES | YES |
| 246 | a | 1435.95 | 8.78548    | YES | YES |
| 247 | a | 1956.99 | 6.56199    | YES | YES |
| 248 | a | 1957.21 | 131.70936  | YES | YES |
| 249 | a | 1958.94 | 590.83785  | YES | YES |
| 250 | a | 1959.09 | 520.55261  | YES | YES |
| 251 | a | 1966.20 | 559.90900  | YES | YES |
| 252 | a | 1966.86 | 1.61831    | YES | YES |
| 253 | a | 1997.00 | 67.15054   | YES | YES |
| 254 | a | 1997.09 | 29.93180   | YES | YES |
| 255 | a | 2000.65 | 929.47322  | YES | YES |
| 256 | a | 2000.71 | 824.98258  | YES | YES |
| 257 | a | 2006.19 | 1473.73305 | YES | YES |
| 258 | a | 2010.55 | 0.25622    | YES | YES |
| 259 | a | 3153.10 | 1.05965    | YES | YES |
| 260 | a | 3153.16 | 1.27537    | YES | YES |
| 261 | a | 3153.23 | 1.06840    | YES | YES |
| 262 | a | 3153.32 | 1.65164    | YES | YES |
| 263 | a | 3153.38 | 0.54044    | YES | YES |
| 264 | a | 3153.38 | 1.34686    | YES | YES |
| 265 | a | 3157.09 | 1.41987    | YES | YES |
| 266 | a | 3157.25 | 1.62043    | YES | YES |
| 267 | a | 3157.29 | 0.63162    | YES | YES |
| 268 | a | 3157.39 | 2.06307    | YES | YES |
| 269 | a | 3159.41 | 1.25424    | YES | YES |
| 270 | a | 3159.46 | 1.45724    | YES | YES |
| 271 | a | 3167.58 | 1.29816    | YES | YES |
| 272 | a | 3167.61 | 2.24355    | YES | YES |
| 273 | a | 3167.63 | 0.03974    | YES | YES |
| 274 | a | 3167.72 | 1.11626    | YES | YES |
| 275 | a | 3168.07 | 2.45550    | YES | YES |
| 276 | a | 3168.10 | 1.00914    | YES | YES |
| 277 | a | 3170.93 | 0.36618    | YES | YES |
| 278 | a | 3171.12 | 7.68554    | YES | YES |
| 279 | a | 3171.89 | 4.95184    | YES | YES |

|     |   |         |         |     |     |
|-----|---|---------|---------|-----|-----|
| 280 | a | 3171.94 | 3.30118 | YES | YES |
| 281 | a | 3175.09 | 3.48858 | YES | YES |
| 282 | a | 3175.13 | 4.28674 | YES | YES |
| 283 | a | 3180.42 | 2.61292 | YES | YES |
| 284 | a | 3180.45 | 0.26105 | YES | YES |
| 285 | a | 3180.71 | 1.37713 | YES | YES |
| 286 | a | 3180.77 | 1.35446 | YES | YES |
| 287 | a | 3181.78 | 1.95392 | YES | YES |
| 288 | a | 3181.81 | 1.08643 | YES | YES |

## References

- 
- <sup>[1]</sup> T. Fjeldberg, A. Haaland, B. E. R. Schilling, M. F. Lappert, A. J. Thorne, *J. Chem. Society, Dalton Trans.* **1986**, 8, 1551-1556.
- <sup>[2]</sup> (a) G. M. Sheldrick, *Acta Crystallogr.* **2008**, A64, 112–122. (b) G. M. Sheldrick, *Acta Crystallogr., Sect. C: Struct. Chem.* **2015**, C71, 3–8.
- <sup>[3]</sup> O. V. Dolomanov, L. J. Bourhis, R. J. Gildea, J. A. K. Howard, H. Puschmann, *J. Appl. Crystallogr.* **2009**, 42, 339–341.
- <sup>[4]</sup> Turbomole: O. Treutler, R. Ahlrichs, *J. Chem. Phys.* **1995**, 102, 346 – 354. BP86 functional: a) J. P. Perdew, *Phys. Rev. B* **1986**, 33, 8822 – 8884; b) A. D. Becke, *Phys. Rev. A* **1988**, 38, 3098 – 3100. RI-DFT: K. Eichkorn, O. Treutler, H. Öhm, M. Häser, R. Ahlrichs, *Chem. Phys. Lett.* **1995**, 240, 283 – 290. SVP: a) A. Schäfer, H. Horn, R. Ahlrichs, *J. Chem. Phys.* **1992**, 97, 2751 – 2777. TmoleX client: C. Steffen, K. Thomas, U. Huniar, A. Hellweg, O. Rubner, A. Schroer, *J. Comput. Chem.* **2010**, 31, 2967 – 2970.
- <sup>[5]</sup> S. Grimme, J. Antony, S. Ehrlich, H. Krieg, *J. Chem. Phys.* **2010**, 132, 154104.
- <sup>[6]</sup> A. Klamt, G. Schüürmann, *J. Chem. Soc. Perkin Trans. 2* **1993**, 5, 799–805.
